# Supplementary material for: Network Analysis Combining Proteomics and Metabolomics Reveals New Insights Into Early Responses of Eucalyptus grandis During Rust Infection
Source: Front Plant Sci. 2021 Jan 7;11:604849. doi: 10.3389/fpls.2020.604849 (PMC7817549; doi:10.3389/fpls.2020.604849)
Supplement: Supplementary Table 4 — Resistant_12H_R-yellow. [file Table_4.XLSX]

## Sheet: RES_ProteinModule-yellow
#pacId	locusName	transcriptName	peptideName	Pfam	Panther	KOG	KEGG/ec	KO	GO	Best-hit-arabi-name	arabi-symbol	arabi-defline
32049181	Eucgr.A00095	Eucgr.A00095.1	Eucgr.A00095.1.p	PF00294	PTHR10584,PTHR10584:SF168	KOG2855	2.7.1.4	K00847		AT2G31390.1		pfkB-like carbohydrate kinase family protein
32045917	Eucgr.A00373	Eucgr.A00373.1	Eucgr.A00373.1.p	PF00582	PTHR31964,PTHR31964:SF23				GO:0006950	AT3G17020.1		Adenine nucleotide alpha hydrolases-like superfamily protein
32046294	Eucgr.A00746	Eucgr.A00746.1	Eucgr.A00746.1.p	PF00234	PTHR33076,PTHR33076:SF11					AT2G38540.1	ATLTP1,LP1,LTP1	lipid transfer protein 1
32046052	Eucgr.A00992	Eucgr.A00992.1	Eucgr.A00992.1.p	PF00160	PTHR11071,PTHR11071:SF247	KOG0880	5.2.1.8	K03768	GO:0006457,GO:0003755,GO:0000413	AT3G62030.3	ROC4	rotamase CYP 4
32047591	Eucgr.A01047	Eucgr.A01047.1	Eucgr.A01047.1.p	PF00504	PTHR21649,PTHR21649:SF8			K08913	GO:0016020,GO:0009765	AT2G05070.1	LHCB2,LHCB2.2	photosystem II light harvesting complex gene 2.2
32048462	Eucgr.A01769	Eucgr.A01769.1	Eucgr.A01769.1.p	PF00355,PF08802	PTHR10134,PTHR10134:SF5	KOG1671	1.10.9.1	K02636	GO:0055114,GO:0051537,GO:0016491,GO:0042651,GO:0009496,GO:0016679	AT4G03280.1	PETC,PGR1	photosynthetic electron transfer C
32049074	Eucgr.A01933	Eucgr.A01933.1	Eucgr.A01933.1.p	PF00004,PF01434	PTHR23076,PTHR23076:SF60			K03798	GO:0005524,GO:0006508,GO:0004222	AT2G30950.1	FTSH2,VAR2	FtsH extracellular protease family
32047950	Eucgr.A02039	Eucgr.A02039.1	Eucgr.A02039.1.p	PF01789	PTHR31407,PTHR31407:SF6			K02717	GO:0019898,GO:0015979,GO:0009654,GO:0009523,GO:0005509	AT1G06680.1	OE23,OEE2,PSBP-1,PSII-P	photosystem II subunit P-1
32047337	Eucgr.A02756	Eucgr.A02756.1	Eucgr.A02756.1.p	PF00168	PTHR32246,PTHR32246:SF17				GO:0005515	AT5G23950.1		Calcium-dependent lipid-binding (CaLB domain) family protein
32055957	Eucgr.B00034	Eucgr.B00034.1	Eucgr.B00034.1.p	PF00244	PTHR18860,PTHR18860:SF26	KOG0841		K06630	GO:0019904	AT1G35160.1	14-3-3PHI,GF14 PHI,GRF4	GF14 protein phi chain
32061647	Eucgr.B00316	Eucgr.B00316.1	Eucgr.B00316.1.p	PF13288,PF08436,PF02670	PTHR30525,PTHR30525:SF2		1.1.1.267	K00099	GO:0005515,GO:0070402,GO:0055114,GO:0046872,GO:0030604,GO:0008299	AT5G62790.1	DXR,PDE129	1-deoxy-D-xylulose 5-phosphate reductoisomerase
32059400	Eucgr.B00856	Eucgr.B00856.1	Eucgr.B00856.1.p	PF00400	PTHR19868,PTHR19868:SF0	KOG0279		K14753	GO:0005515	AT1G48630.1	RACK1B_AT	receptor for activated C kinase 1B
32061398	Eucgr.B01747	Eucgr.B01747.2	Eucgr.B01747.2.p	PF08100,PF00891	PTHR11746,PTHR11746:SF106	KOG3178	2.1.1.76,2.1.1.68,2.1.1.42	K13066	GO:0046983,GO:0008171	AT5G54160.1	ATOMT1,OMT1	O-methyltransferase 1
32059496	Eucgr.B02112	Eucgr.B02112.1	Eucgr.B02112.1.p	PF06026	PTHR11934,PTHR11934:SF0	KOG3075	5.3.1.6	K01807	GO:0009052,GO:0004751	AT3G04790.1		Ribose 5-phosphate isomerase, type A protein
32059362	Eucgr.B02162	Eucgr.B02162.1	Eucgr.B02162.1.p	PF02427	PTHR34549,PTHR34549:SF2			K02693	GO:0015979,GO:0009538,GO:0009522	AT2G20260.1	PSAE-2	photosystem I subunit E-2
32060411	Eucgr.B02456	Eucgr.B02456.1	Eucgr.B02456.1.p	PF00141	PTHR31356,PTHR31356:SF10		1.11.1.11	K00434	GO:0055114,GO:0020037,GO:0006979,GO:0004601	AT1G07890.2	APX1,ATAPX01,ATAPX1,CS1,MEE6	ascorbate peroxidase 1
32061615	Eucgr.B02532	Eucgr.B02532.2	Eucgr.B02532.2.p	PF00118	PTHR11353,PTHR11353:SF11				GO:0005524	AT2G28000.1	CH-CPN60A,CPN60A,SLP	chaperonin-60alpha
32061401	Eucgr.B02879	Eucgr.B02879.1	Eucgr.B02879.1.p	PF00175	PTHR19370,PTHR19370:SF123	KOG0534			GO:0055114,GO:0016491	AT1G15140.1		FAD/NAD(P)-binding oxidoreductase
32061579	Eucgr.B02942	Eucgr.B02942.2	Eucgr.B02942.2.p	PF00408,PF02879,PF02880,PF02878	PTHR22573,PTHR22573:SF47		5.4.2.2	K01835	GO:0071704,GO:0016868,GO:0005975	AT1G23190.1		Phosphoglucomutase/phosphomannomutase family protein
32061582	Eucgr.B03110	Eucgr.B03110.1	Eucgr.B03110.1.p	PF02518,PF00183	PTHR11528,PTHR11528:SF41			K09487	GO:0051082,GO:0006950,GO:0006457,GO:0005524	AT2G04030.1	AtHsp90.5,CR88,EMB1956,Hsp88.1,HSP90.5	Chaperone protein htpG family protein
32062193	Eucgr.B03178	Eucgr.B03178.1	Eucgr.B03178.1.p		PTHR35098,PTHR35098:SF1					AT2G03440.1	ATNRP1,NRP1	nodulin-related protein 1
32062013	Eucgr.B03621	Eucgr.B03621.1	Eucgr.B03621.1.p	PF00271,PF00270	PTHR24031,PTHR24031:SF235		3.6.4.13	K11594	GO:0005524,GO:0003676	AT2G42520.1		P-loop containing nucleoside triphosphate hydrolases superfamily protein
32059805	Eucgr.B03720	Eucgr.B03720.1	Eucgr.B03720.1.p	PF00266	PTHR21152,PTHR21152:SF21	KOG2862	2.6.1.51,2.6.1.44,2.6.1.45	K00830		AT2G13360.2	AGT,AGT1,SGAT	alanine:glyoxylate aminotransferase
32059511	Eucgr.B03754	Eucgr.B03754.1	Eucgr.B03754.1.p	PF00166	PTHR10772,PTHR10772:SF8	KOG1641		K04078	GO:0006457,GO:0005737	AT1G14980.1	CPN10	chaperonin 10
32058951	Eucgr.B03771	Eucgr.B03771.1	Eucgr.B03771.1.p	PF10584,PF00227	PTHR11599,PTHR11599:SF65	KOG0184	3.4.25.1	K02727	GO:0019773,GO:0006511,GO:0004175,GO:0051603,GO:0005839,GO:0004298	AT2G27020.1	PAG1	20S proteasome alpha subunit G1
32037269	Eucgr.C00142	Eucgr.C00142.1	Eucgr.C00142.1.p	PF03900,PF01379	PTHR11557	KOG2892	2.5.1.61	K01749	GO:0033014,GO:0004418	AT5G08280.1	HEMC	hydroxymethylbilane synthase
32038221	Eucgr.C00345	Eucgr.C00345.1	Eucgr.C00345.1.p	PF02789,PF00883	PTHR11963,PTHR11963:SF17		3.4.11.1,3.4.11.5	K01255	GO:0006508,GO:0005622,GO:0004177	AT4G30920.1		Cytosol aminopeptidase family protein
32039993	Eucgr.C00774	Eucgr.C00774.1	Eucgr.C00774.1.p	PF08534	PTHR10681	KOG0855	1.11.1.15	K03564	GO:0016491	AT3G26060.1	ATPRX Q	Thioredoxin superfamily protein
32039571	Eucgr.C02133	Eucgr.C02133.1	Eucgr.C02133.1.p	PF00227	PTHR11599,PTHR11599:SF4	KOG0174	3.4.25.1	K02738	GO:0051603,GO:0005839,GO:0004298	AT4G31300.1	PBA1	N-terminal nucleophile aminohydrolases (Ntn hydrolases) superfamily protein
32037911	Eucgr.C03199	Eucgr.C03199.1	Eucgr.C03199.1.p	PF00534,PF00862	PTHR12526,PTHR12526:SF391		2.4.1.13	K00695	GO:0016157,GO:0005985	AT3G43190.1	ATSUS4,SUS4	sucrose synthase 4
32038641	Eucgr.C03418	Eucgr.C03418.1	Eucgr.C03418.1.p	PF04851,PF00271	PTHR24031,PTHR24031:SF294		3.6.4.13	K03257	GO:0016787,GO:0005524,GO:0003677	AT3G13920.1	EIF4A1,RH4,TIF4A1	eukaryotic translation initiation factor 4A1
32035932	Eucgr.C03704	Eucgr.C03704.1	Eucgr.C03704.1.p	PF05193,PF00675	PTHR11851,PTHR11851:SF145		1.10.2.2,3.4.24.64	K01412		AT1G51980.1		Insulinase (Peptidase family M16) protein
32035933	Eucgr.C03704	Eucgr.C03704.2	Eucgr.C03704.2.p	PF05193,PF00675	PTHR11851,PTHR11851:SF145	KOG2067	1.10.2.2,3.4.24.64			AT1G51980.1		Insulinase (Peptidase family M16) protein
32036307	Eucgr.C04168	Eucgr.C04168.1	Eucgr.C04168.1.p	PF00025	PTHR24071	KOG0096	4.2.1.17	K07936	GO:0005525	AT5G55190.1	ATRAN3,RAN3	RAN GTPase 3
32049863	Eucgr.D00028	Eucgr.D00028.1	Eucgr.D00028.1.p	PF00085	PTHR10438,PTHR10438:SF275	KOG0907	1.6.5.4	K03671	GO:0045454,GO:0015035,GO:0006662	AT2G35010.2	ATO1,TO1	thioredoxin O1
32049482	Eucgr.D00281	Eucgr.D00281.1	Eucgr.D00281.1.p	PF02826,PF05221	PTHR23420		3.3.1.1	K01251	GO:0055114,GO:0051287,GO:0006730,GO:0004013	AT4G13940.1	ATSAHH1,EMB1395,HOG1,MEE58,SAHH1	S-adenosyl-L-homocysteine hydrolase
32051879	Eucgr.D00301	Eucgr.D00301.2	Eucgr.D00301.2.p	PF00411	PTHR11759,PTHR11759:SF12				GO:0006412,GO:0005840,GO:0003735	AT3G52580.1		Ribosomal protein S11 family protein
32052193	Eucgr.D01807	Eucgr.D01807.1	Eucgr.D01807.1.p	PF13414,PF04969	PTHR22904,PTHR22904:SF344			K12795		AT4G11260.1	ATSGT1B,EDM1,ETA3,RPR1,SGT1B	phosphatase-related
32049996	Eucgr.D01833	Eucgr.D01833.1	Eucgr.D01833.1.p	PF01433,PF11940	PTHR11533,PTHR11533:SF152	KOG1046	3.4.11.14	K01256	GO:0008270,GO:0008237,GO:0006508	AT1G63770.3		Peptidase M1 family protein
32049584	Eucgr.D02023	Eucgr.D02023.1	Eucgr.D02023.1.p	PF03144,PF00679,PF14492,PF03764,PF00009	PTHR23115,PTHR23115:SF66			K02355	GO:0005525	AT1G62750.1	ATSCO1,ATSCO1/CPEF-G,SCO1	Translation elongation factor EFG/EF2 protein
32051123	Eucgr.D02118	Eucgr.D02118.1	Eucgr.D02118.1.p	PF09598,PF04774	PTHR12299,PTHR12299:SF24	KOG2945		K13199		AT4G17520.1		Hyaluronan / mRNA binding family
32051895	Eucgr.D02466	Eucgr.D02466.1	Eucgr.D02466.1.p	PF02780,PF02779,PF00456	PTHR11624,PTHR11624:SF81		2.2.1.1	K00615	GO:0008152,GO:0003824	AT2G45290.1		Transketolase
32050623	Eucgr.D02467	Eucgr.D02467.1	Eucgr.D02467.1.p	PF02780,PF02779,PF00456	PTHR11624,PTHR11624:SF81		2.2.1.2,2.2.1.1	K00615	GO:0008152,GO:0003824	AT2G45290.1		Transketolase
32028361	Eucgr.E00001	Eucgr.E00001.1	Eucgr.E00001.1.p	PF01370	PTHR10366,PTHR10366:SF375				GO:0050662,GO:0003824	AT4G39230.1		NmrA-like negative transcriptional regulator family protein
32030639	Eucgr.E00015	Eucgr.E00015.1	Eucgr.E00015.1.p	PF14159	PTHR33222,PTHR33222:SF9					AT2G46820.2	PSAP,PSI-P,PTAC8,TMP14	photosystem I P subunit
32031288	Eucgr.E00068	Eucgr.E00068.1	Eucgr.E00068.1.p		PTHR11177,PTHR11177:SF167			K17525		AT4G01050.1	TROL	thylakoid rhodanese-like
32030400	Eucgr.E00280	Eucgr.E00280.1	Eucgr.E00280.1.p	PF00153	PTHR24089,PTHR24089:SF341	KOG0758		K15109		AT5G46800.1	BOU	Mitochondrial substrate carrier family protein
32031830	Eucgr.E00872	Eucgr.E00872.1	Eucgr.E00872.1.p	PF01073	PTHR10366,PTHR10366:SF308		5.1.3.2	K01784	GO:0055114,GO:0016616,GO:0006694,GO:0003854	AT4G10960.1	UGE5	UDP-D-glucose/UDP-D-galactose 4-epimerase 5
32029079	Eucgr.E01113	Eucgr.E01113.1	Eucgr.E01113.1.p	PF01333,PF16639	PTHR33288,PTHR33288:SF3			K02634	GO:0031361,GO:0020037,GO:0015979,GO:0009055,GO:0005506	ATCG00540.1		photosynthetic electron transfer A
32028279	Eucgr.E01416	Eucgr.E01416.1	Eucgr.E01416.1.p	PF00227	PTHR11599,PTHR11599:SF59	KOG0179	3.4.25.1	K02732	GO:0051603,GO:0005839,GO:0004298	AT3G60820.3	PBF1	N-terminal nucleophile aminohydrolases (Ntn hydrolases) superfamily protein
32029880	Eucgr.E02747	Eucgr.E02747.1	Eucgr.E02747.1.p	PF00244	PTHR18860,PTHR18860:SF31	KOG0841		K06630	GO:0019904	AT2G42590.3	GF14 MU,GRF9	general regulatory factor 9
32055065	Eucgr.F00243	Eucgr.F00243.1	Eucgr.F00243.1.p	PF14290	PTHR36139,PTHR36139:SF1					AT1G47420.1	SDH5	succinate dehydrogenase 5
32053912	Eucgr.F00330	Eucgr.F00330.2	Eucgr.F00330.2.p	PF00244	PTHR18860,PTHR18860:SF12	KOG0841		K06630	GO:0019904	AT1G34760.1	GF14 OMICRON,GRF11,RHS5	general regulatory factor 11
32054800	Eucgr.F01067	Eucgr.F01067.3	Eucgr.F01067.3.p	PF00355,PF08802	PTHR10134,PTHR10134:SF5	KOG1671	1.10.9.1		GO:0055114,GO:0051537,GO:0016491,GO:0042651,GO:0009496,GO:0016679	AT4G03280.1	PETC,PGR1	photosynthetic electron transfer C
32057112	Eucgr.F01206	Eucgr.F01206.1	Eucgr.F01206.1.p	PF00004,PF01434	PTHR23076,PTHR23076:SF33			K03798	GO:0005524,GO:0006508,GO:0004222	AT5G42270.1	FTSH5,VAR1	FtsH extracellular protease family
32056298	Eucgr.F01428	Eucgr.F01428.1	Eucgr.F01428.1.p	PF00043,PF02798	PTHR11260,PTHR11260:SF230	KOG0406	2.5.1.18	K00799	GO:0005515	AT1G78380.1	ATGSTU19,GST8,GSTU19	glutathione S-transferase TAU 19
32057407	Eucgr.F01476	Eucgr.F01476.1	Eucgr.F01476.1.p	PF00162	PTHR11406,PTHR11406:SF8		2.7.2.3	K00927	GO:0006096,GO:0004618	AT1G56190.1		Phosphoglycerate kinase family protein
32056131	Eucgr.F01776	Eucgr.F01776.1	Eucgr.F01776.1.p	PF06628,PF00199	PTHR11465,PTHR11465:SF19		1.11.1.6	K03781	GO:0055114,GO:0020037,GO:0004096,GO:0006979	AT4G35090.1	CAT2	catalase 2
32054526	Eucgr.F01777	Eucgr.F01777.1	Eucgr.F01777.1.p	PF06628,PF00199	PTHR11465,PTHR11465:SF19		1.11.1.6,1.11.1.21	K03781	GO:0055114,GO:0020037,GO:0004096,GO:0006979	AT4G35090.1	CAT2	catalase 2
32056893	Eucgr.F01793	Eucgr.F01793.1	Eucgr.F01793.1.p	PF02672,PF00044,PF02800	PTHR10836,PTHR10836:SF39	KOG0657	1.2.1.12,1.2.1.13	K05298	GO:0055114,GO:0016620	AT1G42970.1	GAPB	glyceraldehyde-3-phosphate dehydrogenase B subunit
32056246	Eucgr.F01822	Eucgr.F01822.2	Eucgr.F01822.2.p	PF01789	PTHR31407,PTHR31407:SF17				GO:0019898,GO:0015979,GO:0009654,GO:0009523,GO:0005509	AT1G76450.1		Photosystem II reaction center PsbP family protein
32057490	Eucgr.F02017	Eucgr.F02017.1	Eucgr.F02017.1.p	PF00274	PTHR11627,PTHR11627:SF19		4.1.2.13	K01623	GO:0006096,GO:0004332	AT4G26530.2		Aldolase superfamily protein
32056002	Eucgr.F02130	Eucgr.F02130.1	Eucgr.F02130.1.p	PF00244	PTHR18860,PTHR18860:SF27	KOG0841		K06630	GO:0019904	AT5G10450.1	14-3-3lambda,AFT1,GRF6	G-box regulating factor 6
32055715	Eucgr.F02457	Eucgr.F02457.1	Eucgr.F02457.1.p	PF13424	PTHR10098,PTHR10098:SF117					AT3G14110.1	FLU	Tetratricopeptide repeat (TPR)-like superfamily protein
32057681	Eucgr.F02482	Eucgr.F02482.1	Eucgr.F02482.1.p	PF00244	PTHR18860,PTHR18860:SF27	KOG0841		K06630	GO:0019904	AT5G38480.1	GRF3,RCI1	general regulatory factor 3
32055834	Eucgr.F02711	Eucgr.F02711.1	Eucgr.F02711.1.p	PF00316	PTHR11556,PTHR11556:SF17		3.1.3.11	K03841	GO:0042578,GO:0042132,GO:0005975	AT1G43670.1		Inositol monophosphatase family protein
32054880	Eucgr.F02905	Eucgr.F02905.2	Eucgr.F02905.2.p	PF01704	PTHR11952,PTHR11952:SF13		2.7.7.9	K00963	GO:0070569,GO:0008152	AT5G17310.2	AtUGP2,UGP2	UDP-glucose pyrophosphorylase 2
32053047	Eucgr.F02968	Eucgr.F02968.1	Eucgr.F02968.1.p	PF13806	PTHR21496,PTHR21496:SF0					AT1G71500.1		Rieske (2Fe-2S) domain-containing protein
32057481	Eucgr.F03036	Eucgr.F03036.1	Eucgr.F03036.1.p	PF03446,PF00389	PTHR10996,PTHR10996:SF139	KOG0069	1.1.1.237	K15919	GO:0055114,GO:0004616,GO:0051287,GO:0016616,GO:0008152	AT1G79870.1		D-isomer specific 2-hydroxyacid dehydrogenase family protein
32057219	Eucgr.F03433	Eucgr.F03433.1	Eucgr.F03433.1.p	PF01946	PTHR10617,PTHR10617:SF115	KOG2960		K03146		AT5G54770.1	THI1,THI4,TZ	thiazole biosynthetic enzyme, chloroplast (ARA6) (THI1) (THI4)
32054779	Eucgr.F03557	Eucgr.F03557.1	Eucgr.F03557.1.p	PF06628,PF00199	PTHR11465,PTHR11465:SF19		1.11.1.6	K03781	GO:0055114,GO:0020037,GO:0004096,GO:0006979	AT4G35090.1	CAT2	catalase 2
32052742	Eucgr.F03703	Eucgr.F03703.1	Eucgr.F03703.1.p	PF00043,PF02798	PTHR11260,PTHR11260:SF287	KOG0867	2.5.1.18	K00799	GO:0005515	AT2G47730.1	ATGSTF5,ATGSTF8,GST6,GSTF8	glutathione S-transferase phi 8
32055991	Eucgr.F03707	Eucgr.F03707.1	Eucgr.F03707.1.p	PF00085	PTHR10438,PTHR10438:SF247	KOG0907	1.6.5.4		GO:0045454,GO:0015035,GO:0006662	AT1G76080.1	ATCDSP32,CDSP32	chloroplastic drought-induced stress protein of 32 kD
32057468	Eucgr.F03796	Eucgr.F03796.2	Eucgr.F03796.2.p	PF00490	PTHR11458		4.2.1.24		GO:0046872,GO:0033014,GO:0004655	AT1G69740.1	HEMB1	Aldolase superfamily protein
32056358	Eucgr.F03862	Eucgr.F03862.1	Eucgr.F03862.1.p	PF00168,PF00614,PF12357	PTHR18896,PTHR18896:SF63		3.1.4.4	K01115	GO:0005515,GO:0003824	AT3G15730.1	PLD,PLDALPHA1	phospholipase D alpha 1
32057003	Eucgr.F03917	Eucgr.F03917.1	Eucgr.F03917.1.p	PF03171,PF14226	PTHR10209,PTHR10209:SF185	KOG0143	1.14.11.32		GO:0055114,GO:0016491	AT1G49390.1		2-oxoglutarate (2OG) and Fe(II)-dependent oxygenase superfamily protein
32055780	Eucgr.F03933	Eucgr.F03933.1	Eucgr.F03933.1.p	PF00180	PTHR11835,PTHR11835:SF53		1.1.1.85	K00052	GO:0055114,GO:0016616,GO:0051287,GO:0000287	AT1G80560.1	ATIMD2,IMD2	isopropylmalate dehydrogenase 2
32055423	Eucgr.F04000	Eucgr.F04000.1	Eucgr.F04000.1.p	PF07991,PF01842,PF00389	PTHR10996,PTHR10996:SF159		1.1.1.95	K00058	GO:0016597,GO:0008152,GO:0055114,GO:0051287,GO:0016616	AT1G17745.1	PGDH	D-3-phosphoglycerate dehydrogenase
32052846	Eucgr.F04219	Eucgr.F04219.1	Eucgr.F04219.1.p	PF02496	PTHR33801,PTHR33801:SF7				GO:0006950
32070239	Eucgr.G00649	Eucgr.G00649.1	Eucgr.G00649.1.p	PF14310,PF00933,PF01915	PTHR30620,PTHR30620:SF40		3.2.1.55,3.2.1.37	K15920	GO:0005975,GO:0004553	AT5G64570.1	ATBXL4,XYL4	beta-D-xylosidase 4
32070309	Eucgr.G01121	Eucgr.G01121.1	Eucgr.G01121.1.p	PF00719	PTHR10286,PTHR10286:SF3	KOG1626	3.6.1.1	K01507	GO:0006796,GO:0005737,GO:0004427,GO:0000287	AT5G09650.1	AtPPa6,PPa6	pyrophosphorylase 6
32070885	Eucgr.G01124	Eucgr.G01124.1	Eucgr.G01124.1.p	PF00155	PTHR11751,PTHR11751:SF376	KOG0257	2.6.1.83	K10206	GO:0030170,GO:0009058	AT4G33680.1	AGD2	Pyridoxal phosphate (PLP)-dependent transferases superfamily protein
32071954	Eucgr.G01342	Eucgr.G01342.1	Eucgr.G01342.1.p	PF00201	PTHR11926,PTHR11926:SF167	KOG1192			GO:0016758,GO:0008152	AT4G15480.1	UGT84A1	UDP-Glycosyltransferase superfamily protein
32070207	Eucgr.G01465	Eucgr.G01465.1	Eucgr.G01465.1.p	PF00675,PF05193,PF08367	PTHR11851,PTHR11851:SF68			K06972	GO:0006508	AT1G49630.1	ATPREP2,PREP2	presequence protease 2
32073140	Eucgr.G01726	Eucgr.G01726.1	Eucgr.G01726.1.p	PF00274	PTHR11627,PTHR11627:SF15		4.1.2.13	K01623	GO:0006096,GO:0004332	AT4G38970.1	FBA2	fructose-bisphosphate aldolase 2
32073005	Eucgr.G01978	Eucgr.G01978.1	Eucgr.G01978.1.p	PF00923	PTHR10683,PTHR10683:SF6	KOG2772	2.2.1.2	K00616	GO:0005975	AT5G13420.1		Aldolase-type TIM barrel family protein
32070676	Eucgr.G02685	Eucgr.G02685.1	Eucgr.G02685.1.p	PF00833	PTHR10732,PTHR10732:SF2	KOG0187		K02962	GO:0006412,GO:0005840,GO:0005622,GO:0003735	AT5G04800.3		Ribosomal S17 family protein
32071100	Eucgr.G02804	Eucgr.G02804.1	Eucgr.G02804.1.p	PF05873	PTHR12700,PTHR12700:SF12	KOG3366		K02138	GO:0015986,GO:0015078,GO:0000276	AT3G52300.1	ATPQ	ATP synthase D chain, mitochondrial
32072804	Eucgr.G02956	Eucgr.G02956.1	Eucgr.G02956.1.p	PF00805	PTHR14136					AT2G44920.2		Tetratricopeptide repeat (TPR)-like superfamily protein
32071914	Eucgr.G03333	Eucgr.G03333.2	Eucgr.G03333.2.p	PF00687	PTHR23105,PTHR23105:SF5	KOG1569				AT3G63490.1		Ribosomal protein L1p/L10e family
32043586	Eucgr.H00128	Eucgr.H00128.2	Eucgr.H00128.2.p	PF00076	PTHR24012	KOG0146,KOG0131,KOG0144			GO:0003676	AT1G60000.1		RNA-binding (RRM/RBD/RNP motifs) family protein
32041855	Eucgr.H00132	Eucgr.H00132.1	Eucgr.H00132.1.p	PF00070	PTHR22912,PTHR22912:SF144	KOG1336	1.6.5.4	K08232	GO:0055114,GO:0016491	AT3G52880.1	ATMDAR1,MDAR1	monodehydroascorbate reductase 1
32041790	Eucgr.H00134	Eucgr.H00134.1	Eucgr.H00134.1.p	PF00238	PTHR11761,PTHR11761:SF10	KOG0901		K02894	GO:0006412,GO:0005840,GO:0003735	AT3G04400.1	emb2171	Ribosomal protein L14p/L23e family protein
32043772	Eucgr.H00144	Eucgr.H00144.2	Eucgr.H00144.2.p	PF04755	PTHR31906,PTHR31906:SF15					AT3G23400.1	FIB4	Plastid-lipid associated protein PAP / fibrillin family protein
32043789	Eucgr.H00245	Eucgr.H00245.3	Eucgr.H00245.3.p	PF03168	PTHR31459,PTHR31459:SF2					AT2G44060.1		Late embryogenesis abundant protein, group 2
32041557	Eucgr.H01016	Eucgr.H01016.1	Eucgr.H01016.1.p	PF02672	PTHR33921,PTHR33921:SF2					AT3G62410.1	CP12,CP12-2	CP12 domain-containing protein 2
32045630	Eucgr.H01176	Eucgr.H01176.5	Eucgr.H01176.5.p	PF00043,PF02798	PTHR11260,PTHR11260:SF201	KOG0867	2.5.1.18		GO:0005515	AT1G02930.1	ATGST1,ATGSTF3,ATGSTF6,ERD11,GST1,GSTF6	glutathione S-transferase 6
32043991	Eucgr.H01393	Eucgr.H01393.1	Eucgr.H01393.1.p	PF00293	PTHR10885,PTHR10885:SF4	KOG0142	5.3.3.2	K01823	GO:0016787,GO:0008299,GO:0004452	AT3G02780.1	IDI2,IPIAT1,IPP2	isopentenyl pyrophosphate:dimethylallyl pyrophosphate isomerase 2
32042406	Eucgr.H01479	Eucgr.H01479.1	Eucgr.H01479.1.p	PF01370	PTHR10366,PTHR10366:SF278				GO:0050662,GO:0003824	AT3G63140.1	CSP41A	chloroplast stem-loop binding protein of 41 kDa
32041038	Eucgr.H02358	Eucgr.H02358.1	Eucgr.H02358.1.p	PF00056,PF02866	PTHR11540,PTHR11540:SF27		1.1.1.37	K00026	GO:0055114,GO:0016491,GO:0016616,GO:0019752	AT2G22780.1	PMDH1	peroxisomal NAD-malate dehydrogenase 1
32044246	Eucgr.H02679	Eucgr.H02679.1	Eucgr.H02679.1.p	PF00464	PTHR11680,PTHR11680:SF11		2.1.2.1	K00600	GO:0016740	AT4G13930.1	SHM4	serine hydroxymethyltransferase 4
32045122	Eucgr.H02991	Eucgr.H02991.1	Eucgr.H02991.1.p	PF00430	PTHR34264			K02109	GO:0045263,GO:0015986,GO:0015078	ATCG00130.1		ATPase, F0 complex, subunit B/B\', bacterial/chloroplast
32042285	Eucgr.H03047	Eucgr.H03047.1	Eucgr.H03047.1.p	PF00056,PF02866	PTHR23382,PTHR23382:SF7		1.1.1.37	K00025	GO:0055114,GO:0016491,GO:0016616,GO:0016615,GO:0006108	AT1G04410.1		Lactate/malate dehydrogenase family protein
32044461	Eucgr.H03305	Eucgr.H03305.1	Eucgr.H03305.1.p	PF04398	PTHR31676,PTHR31676:SF10					AT1G09310.1		Protein of unknown function, DUF538
32044764	Eucgr.H03311	Eucgr.H03311.1	Eucgr.H03311.1.p	PF01370	PTHR10366,PTHR10366:SF289	KOG1371,KOG1430,KOG1429			GO:0050662,GO:0003824	AT1G09340.1	CRB,CSP41B	chloroplast RNA binding
32041542	Eucgr.H03554	Eucgr.H03554.1	Eucgr.H03554.1.p	PF00135	PTHR23024,PTHR23024:SF193	KOG1515	4.2.1.105,3.1.1.1			AT1G47480.1		alpha/beta-Hydrolases superfamily protein
32045263	Eucgr.H04045	Eucgr.H04045.1	Eucgr.H04045.1.p	PF00549,PF00285	PTHR23118,PTHR23118:SF3		2.3.3.8	K01648	GO:0008152,GO:0003824,GO:0046912	AT5G49460.1	ACLB-2	ATP citrate lyase subunit B 2
32043427	Eucgr.H04112	Eucgr.H04112.1	Eucgr.H04112.1.p	PF00438,PF02772,PF02773	PTHR11964,PTHR11964:SF16		2.5.1.6	K00789	GO:0006556,GO:0004478,GO:0005524	AT3G17390.1	MAT4,MTO3,SAMS3	S-adenosylmethionine synthetase family protein
32043713	Eucgr.H04253	Eucgr.H04253.1	Eucgr.H04253.1.p		PTHR35299,PTHR35299:SF2					AT3G04550.1
32041209	Eucgr.H04426	Eucgr.H04426.2	Eucgr.H04426.2.p	PF00080	PTHR10003	KOG0441	1.15.1.1	K04565	GO:0055114,GO:0046872,GO:0006801	AT1G08830.1	CSD1	copper/zinc superoxide dismutase 1
32044103	Eucgr.H04456	Eucgr.H04456.1	Eucgr.H04456.1.p	PF04536	PTHR30373		3.1.3.2			AT1G54780.1	TLP18.3	thylakoid lumen 18.3 kDa protein
32042798	Eucgr.H04624	Eucgr.H04624.1	Eucgr.H04624.1.p	PF02136	PTHR12612	KOG2104			GO:0006810,GO:0005622	AT1G27970.1	NTF2B	nuclear transport factor 2B
32044835	Eucgr.H04673	Eucgr.H04673.1	Eucgr.H04673.1.p	PF00044,PF02800	PTHR10836,PTHR10836:SF59	KOG0657	1.2.1.12	K00134	GO:0055114,GO:0016620	AT1G13440.1	GAPC-2,GAPC2	glyceraldehyde-3-phosphate dehydrogenase C2
32042009	Eucgr.H04753	Eucgr.H04753.1	Eucgr.H04753.1.p	PF13419	PTHR18901,PTHR18901:SF30	KOG2914				AT4G39970.1		Haloacid dehalogenase-like hydrolase (HAD) superfamily protein
32044840	Eucgr.H04880	Eucgr.H04880.1	Eucgr.H04880.1.p	PF15704	PTHR36013					AT2G21870.1	MGP1	copper ion binding;cobalt ion binding;zinc ion binding
32063253	Eucgr.I00200	Eucgr.I00200.2	Eucgr.I00200.2.p	PF05479	PTHR36814,PTHR36814:SF1			K02701	GO:0042651,GO:0015979,GO:0009522,GO:0005516	AT5G64040.1	PSAN	photosystem I reaction center subunit PSI-N, chloroplast, putative / PSI-N, putative (PSAN)
32065663	Eucgr.I01326	Eucgr.I01326.2	Eucgr.I01326.2.p	PF00274	PTHR11627,PTHR11627:SF15		4.1.2.13		GO:0006096,GO:0004332	AT2G21330.1	FBA1	fructose-bisphosphate aldolase 1
32064983	Eucgr.I01374	Eucgr.I01374.1	Eucgr.I01374.1.p	PF00121	PTHR21139,PTHR21139:SF7	KOG1643	5.3.1.1	K01803	GO:0008152,GO:0004807	AT2G21170.1	PDTPI,TIM	triosephosphate isomerase
32063993	Eucgr.I01408	Eucgr.I01408.1	Eucgr.I01408.1.p	PF00141	PTHR31356,PTHR31356:SF9		1.11.1.11	K00434	GO:0055114,GO:0020037,GO:0006979,GO:0004601	AT4G35000.1	APX3	ascorbate peroxidase 3
32064892	Eucgr.I01423	Eucgr.I01423.1	Eucgr.I01423.1.p	PF00389,PF02826	PTHR10996,PTHR10996:SF169	KOG0069	1.1.1.29,1.1.1.81	K15893	GO:0055114,GO:0051287,GO:0016616,GO:0008152	AT1G68010.1	ATHPR1,HPR	hydroxypyruvate reductase
32063373	Eucgr.I01564	Eucgr.I01564.1	Eucgr.I01564.1.p	PF00044,PF02800	PTHR10836,PTHR10836:SF49	KOG0657	1.2.1.12,1.2.1.13	K05298	GO:0055114,GO:0016620	AT1G12900.1	GAPA-2	glyceraldehyde 3-phosphate dehydrogenase A subunit 2
32065194	Eucgr.I01790	Eucgr.I01790.1	Eucgr.I01790.1.p	PF00484	PTHR11002,PTHR11002:SF7	KOG1578	4.2.1.1	K01673	GO:0008270,GO:0004089	AT3G01500.2	ATBCA1,ATSABP3,CA1,SABP3	carbonic anhydrase 1
32034790	Eucgr.J00242	Eucgr.J00242.1	Eucgr.J00242.1.p	PF00316	PTHR11556,PTHR11556:SF2	KOG1458	3.1.3.37	K01100	GO:0042578,GO:0042132,GO:0005975	AT3G55800.1	SBPASE	sedoheptulose-bisphosphatase
32032853	Eucgr.J00263	Eucgr.J00263.1	Eucgr.J00263.1.p	PF01488,PF08501,PF01487	PTHR21089,PTHR21089:SF12	KOG0692	4.2.1.10,1.1.1.25	K13832	GO:0055114,GO:0004764,GO:0003855	AT3G06350.1	EMB3004,MEE32	dehydroquinate dehydratase, putative / shikimate dehydrogenase, putative
32032959	Eucgr.J00657	Eucgr.J00657.1	Eucgr.J00657.1.p	PF00736	PTHR11595,PTHR11595:SF24	KOG1668		K03232	GO:0006414,GO:0005853,GO:0003746	AT5G12110.1		Glutathione S-transferase, C-terminal-like;Translation elongation factor EF1B/ribosomal protein S6
32034901	Eucgr.J00865	Eucgr.J00865.1	Eucgr.J00865.1.p	PF14870	PTHR32010,PTHR32010:SF6					AT5G23120.1	HCF136	photosystem II stability/assembly factor, chloroplast (HCF136)
32034559	Eucgr.J00965	Eucgr.J00965.1	Eucgr.J00965.1.p	PF00141	PTHR31356,PTHR31356:SF10		1.11.1.11	K00434	GO:0055114,GO:0020037,GO:0006979,GO:0004601	AT1G07890.8	APX1,ATAPX01,ATAPX1,CS1,MEE6	ascorbate peroxidase 1
32032256	Eucgr.J01121	Eucgr.J01121.1	Eucgr.J01121.1.p	PF03144,PF03143,PF00009	PTHR23115,PTHR23115:SF157		3.6.5.3	K03231	GO:0005525	AT5G60390.1		GTP binding Elongation factor Tu family protein
32033523	Eucgr.J01477	Eucgr.J01477.1	Eucgr.J01477.1.p	PF00244	PTHR18860,PTHR18860:SF36	KOG0841		K06630	GO:0019904	AT3G02520.1	GF14 NU,GRF7	general regulatory factor 7
32034869	Eucgr.J01758	Eucgr.J01758.1	Eucgr.J01758.1.p		PTHR17130,PTHR17130:SF24					AT1G55480.1	ZKT	protein containing PDZ domain, a K-box domain, and a TPR region
32034870	Eucgr.J01758	Eucgr.J01758.2	Eucgr.J01758.2.p		PTHR17130,PTHR17130:SF24					AT1G55480.1	ZKT	protein containing PDZ domain, a K-box domain, and a TPR region
32033318	Eucgr.J02030	Eucgr.J02030.1	Eucgr.J02030.1.p	PF00004	PTHR32429,PTHR32429:SF12	KOG0651			GO:0005524	AT2G39730.1	RCA	rubisco activase
32032463	Eucgr.J02467	Eucgr.J02467.1	Eucgr.J02467.1.p	PF13685	PTHR21090,PTHR21090:SF13		4.2.3.4	K01735		AT5G66120.2		3-dehydroquinate synthase, putative
32033017	Eucgr.J02596	Eucgr.J02596.2	Eucgr.J02596.2.p	PF10584,PF00227	PTHR11599,PTHR11599:SF14	KOG0176	3.4.25.1		GO:0019773,GO:0006511,GO:0004175,GO:0051603,GO:0005839,GO:0004298	AT3G14290.1	PAE2	20S proteasome alpha subunit E2
32032865	Eucgr.J03199	Eucgr.J03199.1	Eucgr.J03199.1.p	PF00571	PTHR11911					AT5G10860.1		Cystathionine beta-synthase (CBS) family protein
32068608	Eucgr.K00137	Eucgr.K00137.1	Eucgr.K00137.1.p	PF09360	PTHR13680	KOG3461			GO:0051537,GO:0043231	AT5G51720.1		2 iron, 2 sulfur cluster binding
32066734	Eucgr.K00588	Eucgr.K00588.2	Eucgr.K00588.2.p	PF00438,PF02772,PF02773	PTHR11964,PTHR11964:SF16		2.5.1.6	K00789	GO:0006556,GO:0004478,GO:0005524	AT1G02500.2	AtSAM1,MAT1,SAM-1,SAM1	S-adenosylmethionine synthetase 1
32066446	Eucgr.K00727	Eucgr.K00727.1	Eucgr.K00727.1.p	PF00202	PTHR11986,PTHR11986:SF84		5.4.3.8	K01845	GO:0030170,GO:0008483	AT5G63570.1	GSA1	glutamate-1-semialdehyde-2,1-aminomutase
32066117	Eucgr.K00947	Eucgr.K00947.1	Eucgr.K00947.1.p	PF13326	PTHR34041,PTHR34041:SF1			K08902	GO:0010207	AT1G03600.1	PSB27	photosystem II family protein
32068500	Eucgr.K01105	Eucgr.K01105.2	Eucgr.K01105.2.p	PF07991,PF01450	PTHR21371,PTHR21371:SF11		1.1.1.86	K00053	GO:0055114,GO:0009082,GO:0004455,GO:0016491	AT3G58610.3		ketol-acid reductoisomerase
32067423	Eucgr.K01283	Eucgr.K01283.1	Eucgr.K01283.1.p	PF00234	PTHR33076,PTHR33076:SF11					AT2G38540.1	ATLTP1,LP1,LTP1	lipid transfer protein 1
32067933	Eucgr.K01372	Eucgr.K01372.1	Eucgr.K01372.1.p	PF00483	PTHR22572,PTHR22572:SF101	KOG1322	2.7.7.27	K00975	GO:0016779,GO:0009058	AT5G48300.1	ADG1,APS1	ADP glucose pyrophosphorylase 1
32068385	Eucgr.K01490	Eucgr.K01490.1	Eucgr.K01490.1.p	PF08659	PTHR24322,PTHR24322:SF429	KOG0725		K00059		AT3G03980.1		NAD(P)-binding Rossmann-fold superfamily protein
32066155	Eucgr.K02778	Eucgr.K02778.1	Eucgr.K02778.1.p	PF00076	PTHR24012	KOG0131			GO:0003676	AT5G50250.1	CP31B	chloroplast RNA-binding protein 31B
32067161	Eucgr.K02786	Eucgr.K02786.1	Eucgr.K02786.1.p	PF03144,PF03143,PF00009	PTHR23115,PTHR23115:SF146		3.6.5.3	K02358	GO:0005525	AT4G20360.1	ATRAB8D,ATRABE1B,RABE1b	RAB GTPase homolog E1B
32067434	Eucgr.K02950	Eucgr.K02950.4	Eucgr.K02950.4.p	PF01187	PTHR11954,PTHR11954:SF20	KOG1759	5.3.2.1,5.3.3.12			AT5G01650.2		Tautomerase/MIF superfamily protein
32068916	Eucgr.K02983	Eucgr.K02983.1	Eucgr.K02983.1.p	PF00504	PTHR21649,PTHR21649:SF6			K08915	GO:0016020,GO:0009765	AT3G08940.2	LHCB4.2	light harvesting complex photosystem II
32068529	Eucgr.K03531	Eucgr.K03531.3	Eucgr.K03531.3.p	PF13098	PTHR18929,PTHR18929:SF91	KOG0190	5.3.4.1			AT2G47470.1	ATPDI11,ATPDIL2-1,MEE30,PDI11,UNE5	thioredoxin family protein
32027848	Eucgr.L01102	Eucgr.L01102.1	Eucgr.L01102.1.p	PF00248	PTHR11732,PTHR11732:SF226	KOG1575	1.1.1.317			AT1G60690.1		NAD(P)-linked oxidoreductase superfamily protein
32040412	Eucgr.L01448	Eucgr.L01448.1	Eucgr.L01448.1.p	PF00903	PTHR10374,PTHR10374:SF17	KOG2943	4.4.1.5			AT1G11840.6	ATGLX1,GLX1	glyoxalase I homolog
32035887	Eucgr.L02175	Eucgr.L02175.1	Eucgr.L02175.1.p	PF00120,PF03951	PTHR20852,PTHR20852:SF53		6.3.1.2		GO:0006807,GO:0004356,GO:0006542	AT5G35630.1	ATGSL1,GLN2,GS2	glutamine synthetase 2

## Sheet: GO-terms
GO term	Ontology	Description	Number in input list	Number in BG/Ref	p-value	FDR
GO:0015979	P	photosynthesis	8	89	1.4e-07	5.1e-05
GO:0044710	P	single-organism metabolic process	39	2807	4.4e-07	7.8e-05
GO:0006091	P	generation of precursor metabolites and energy	7	90	2.2e-06	0.00026
GO:0044281	P	small molecule metabolic process	15	610	6.4e-06	0.00057
GO:0006732	P	coenzyme metabolic process	7	117	1.1e-05	0.00065
GO:0009144	P	purine nucleoside triphosphate metabolic process	6	88	2.4e-05	0.00065
GO:0009167	P	purine ribonucleoside monophosphate metabolic process	6	87	2.3e-05	0.00065
GO:0009161	P	ribonucleoside monophosphate metabolic process	6	87	2.3e-05	0.00065
GO:0009199	P	ribonucleoside triphosphate metabolic process	6	88	2.4e-05	0.00065
GO:0009141	P	nucleoside triphosphate metabolic process	6	90	2.7e-05	0.00065
GO:0009205	P	purine ribonucleoside triphosphate metabolic process	6	88	2.4e-05	0.00065
GO:0009126	P	purine nucleoside monophosphate metabolic process	6	87	2.3e-05	0.00065
GO:0046034	P	ATP metabolic process	6	82	1.7e-05	0.00065
GO:0009123	P	nucleoside monophosphate metabolic process	6	90	2.7e-05	0.00065
GO:0019693	P	ribose phosphate metabolic process	7	116	1.1e-05	0.00065
GO:0046496	P	nicotinamide nucleotide metabolic process	5	57	3.9e-05	0.00076
GO:0051186	P	cofactor metabolic process	7	143	3.8e-05	0.00076
GO:0019362	P	pyridine nucleotide metabolic process	5	57	3.9e-05	0.00076
GO:0006733	P	oxidoreduction coenzyme metabolic process	5	58	4.2e-05	0.00078
GO:0072524	P	pyridine-containing compound metabolic process	5	61	5.2e-05	0.00082
GO:0055114	P	oxidation-reduction process	26	1849	5.3e-05	0.00082
GO:0008152	P	metabolic process	79	9388	5.5e-05	0.00082
GO:0009117	P	nucleotide metabolic process	7	149	4.9e-05	0.00082
GO:0006753	P	nucleoside phosphate metabolic process	7	151	5.3e-05	0.00082
GO:0042278	P	purine nucleoside metabolic process	6	105	6.2e-05	0.00085
GO:0046128	P	purine ribonucleoside metabolic process	6	105	6.2e-05	0.00085
GO:0009259	P	ribonucleotide metabolic process	6	109	7.6e-05	0.00093
GO:0009150	P	purine ribonucleotide metabolic process	6	109	7.6e-05	0.00093
GO:0009119	P	ribonucleoside metabolic process	6	108	7.2e-05	0.00093
GO:1901575	P	organic substance catabolic process	8	224	9.1e-05	0.0011
GO:0006163	P	purine nucleotide metabolic process	6	120	0.00013	0.0014
GO:0072521	P	purine-containing compound metabolic process	6	122	0.00014	0.0015
GO:0009056	P	catabolic process	8	244	0.00016	0.0017
GO:0055086	P	nucleobase-containing small molecule metabolic process	7	181	0.00016	0.0017
GO:0009116	P	nucleoside metabolic process	6	132	0.00021	0.002
GO:1901657	P	glycosyl compound metabolic process	6	132	0.00021	0.002
GO:1901564	P	organonitrogen compound metabolic process	15	849	0.00025	0.0024
GO:0006979	P	response to oxidative stress	6	138	0.00026	0.0024
GO:0019637	P	organophosphate metabolic process	7	230	0.00064	0.0059
GO:1901135	P	carbohydrate derivative metabolic process	7	274	0.0017	0.015
GO:0006082	P	organic acid metabolic process	8	366	0.0021	0.019
GO:0019752	P	carboxylic acid metabolic process	7	328	0.0046	0.039
GO:1901566	P	organonitrogen compound biosynthetic process	10	618	0.0052	0.043
GO:0043436	P	oxoacid metabolic process	7	337	0.0053	0.043
GO:0044699	P	single-organism process	40	4462	0.0058	0.046
GO:0019904	F	protein domain specific binding	6	12	8.1e-10	1.5e-07
GO:0016616	F	oxidoreductase activity, acting on the CH-OH group of donors, NAD or NADP as acceptor	10	123	9e-09	8.4e-07
GO:0016614	F	oxidoreductase activity, acting on CH-OH group of donors	10	140	2.8e-08	1.8e-06
GO:0016491	F	oxidoreductase activity	28	2023	3.4e-05	0.0016
GO:0051287	F	NAD binding	5	71	0.0001	0.0039
GO:0016684	F	oxidoreductase activity, acting on peroxide as acceptor	6	133	0.00021	0.005
GO:0048037	F	cofactor binding	11	469	0.00018	0.005
GO:0004601	F	peroxidase activity	6	131	0.0002	0.005
GO:0016209	F	antioxidant activity	6	148	0.00037	0.0077
GO:0050662	F	coenzyme binding	9	361	0.00046	0.0085
GO:0016853	F	isomerase activity	5	139	0.0019	0.033
GO:0034357	C	photosynthetic membrane	7	57	1.2e-07	2e-06
GO:0009579	C	thylakoid	7	58	1.4e-07	2e-06
GO:0044436	C	thylakoid part	7	58	1.4e-07	2e-06
GO:0042651	C	thylakoid membrane	6	33	1.3e-07	2e-06
GO:0005622	C	intracellular	23	1726	0.00034	0.004
GO:0044464	C	cell part	23	1831	0.00077	0.0065
GO:0005623	C	cell	23	1831	0.00077	0.0065
GO:0044424	C	intracellular part	21	1649	0.0011	0.0083
GO:0098796	C	membrane protein complex	6	193	0.0014	0.0092
GO:0043234	C	protein complex	11	616	0.0016	0.0095
GO:0032991	C	macromolecular complex	14	929	0.0019	0.0099
