# Supplementary material for: Network Analysis Combining Proteomics and Metabolomics Reveals New Insights Into Early Responses of Eucalyptus grandis During Rust Infection
Source: Front Plant Sci. 2021 Jan 7;11:604849. doi: 10.3389/fpls.2020.604849 (PMC7817549; doi:10.3389/fpls.2020.604849)
Supplement: Supplementary Table 6 — Resistant_24H_R-brown. [file Table_6.XLSX]

## Sheet: RES_ProteinModule-brown
#pacId	locusName	transcriptName	peptideName	Pfam	Panther	KOG	KEGG/ec	KO	GO	Best-hit-arabi-name	arabi-symbol	arabi-defline
32048086	Eucgr.A00264	Eucgr.A00264.1	Eucgr.A00264.1.p	PF00421	PTHR33180,PTHR33180:SF8			K02704	GO:0019684,GO:0016168,GO:0016020,GO:0009767,GO:0009521	ATCG00680.1		photosystem II reaction center protein B
32048505	Eucgr.A00868	Eucgr.A00868.2	Eucgr.A00868.2.p	PF06415,PF01676	PTHR31637,PTHR31637:SF3		5.4.2.12,5.4.2.11		GO:0030145,GO:0006007,GO:0005737,GO:0004619,GO:0046872,GO:0003824	AT3G08590.1		Phosphoglycerate mutase, 2,3-bisphosphoglycerate-independent
32048210	Eucgr.A01129	Eucgr.A01129.1	Eucgr.A01129.1.p	PF00694,PF00330	PTHR11670,PTHR11670:SF37		4.2.1.3	K01681	GO:0008152	AT2G05710.1	ACO3	aconitase 3
32045828	Eucgr.A01406	Eucgr.A01406.1	Eucgr.A01406.1.p	PF02482,PF16321	PTHR33231,PTHR33231:SF1				GO:0044238	AT5G24490.1		30S ribosomal protein, putative
32047388	Eucgr.A01428	Eucgr.A01428.1	Eucgr.A01428.1.p	PF00173	PTHR19359,PTHR19359:SF22	KOG0537				AT5G53560.1	ATB5-A,ATCB5-E,B5 #2,CB5-E	cytochrome B5 isoform E
32046998	Eucgr.A02249	Eucgr.A02249.1	Eucgr.A02249.1.p	PF01493,PF04898,PF00310,PF01645	PTHR11938,PTHR11938:SF94		1.4.7.1		GO:0055114,GO:0016491,GO:0008152,GO:0015930,GO:0006807,GO:0016638,GO:0006537	AT5G04140.1	FD-GOGAT,GLS1,GLU1,GLUS	glutamate synthase 1
32045985	Eucgr.A02852	Eucgr.A02852.1	Eucgr.A02852.1.p	PF12695	PTHR23024,PTHR23024:SF219	KOG1515	3.1.1.1			AT5G62180.1	AtCXE20,CXE20	carboxyesterase 20
32048752	Eucgr.A02874	Eucgr.A02874.1	Eucgr.A02874.1.p	PF02861	PTHR11638,PTHR11638:SF105				GO:0019538	AT4G25370.1		Double Clp-N motif protein
32048607	Eucgr.A02929	Eucgr.A02929.1	Eucgr.A02929.1.p	PF01625	PTHR10173,PTHR10173:SF23	KOG1635	1.8.4.11	K07304	GO:0055114,GO:0008113,GO:0030091,GO:0016671,GO:0006979	AT4G25130.1	PMSR4	peptide met sulfoxide reductase 4
32060137	Eucgr.B00172	Eucgr.B00172.1	Eucgr.B00172.1.p	PF01625	PTHR10173,PTHR10173:SF41	KOG1635	1.8.4.11	K07304	GO:0055114,GO:0008113,GO:0030091,GO:0016671,GO:0006979	AT5G61640.1	ATMSRA1,PMSR1	peptidemethionine sulfoxide reductase 1
32060870	Eucgr.B00242	Eucgr.B00242.1	Eucgr.B00242.1.p	PF02933,PF07724,PF05496,PF02359	PTHR23077,PTHR23077:SF82		3.6.4.6	K13525	GO:0005524,GO:0009378,GO:0006310,GO:0006281	AT5G03340.1		ATPase, AAA-type, CDC48 protein
32058263	Eucgr.B00425	Eucgr.B00425.1	Eucgr.B00425.1.p	PF06549	PTHR31425,PTHR31425:SF3					AT1G74730.1		Protein of unknown function (DUF1118)
32061218	Eucgr.B00511	Eucgr.B00511.1	Eucgr.B00511.1.p	PF01073,PF02866	PTHR11540,PTHR11540:SF29		1.1.1.37	K00026	GO:0055114,GO:0016616,GO:0006694,GO:0003854,GO:0019752	AT3G47520.1	MDH	malate dehydrogenase
32061789	Eucgr.B00523	Eucgr.B00523.1	Eucgr.B00523.1.p	PF00504	PTHR21649,PTHR21649:SF17			K08910	GO:0016020,GO:0009765	AT3G47470.1	CAB4,LHCA4	light-harvesting chlorophyll-protein complex I subunit A4
32060254	Eucgr.B00532	Eucgr.B00532.6	Eucgr.B00532.6.p	PF00834	PTHR11749,PTHR11749:SF4	KOG3111	5.1.3.1		GO:0016857,GO:0005975	AT5G61410.1	EMB2728,RPE	D-ribulose-5-phosphate-3-epimerase
32061958	Eucgr.B00732	Eucgr.B00732.1	Eucgr.B00732.1.p	PF01251	PTHR11278,PTHR11278:SF1	KOG3320		K02993	GO:0006412,GO:0005840,GO:0005622,GO:0003735	AT1G48830.1		Ribosomal protein S7e family protein
32058107	Eucgr.B01088	Eucgr.B01088.1	Eucgr.B01088.1.p	PF02531	PTHR31982,PTHR31982:SF4			K02692	GO:0015979,GO:0009538,GO:0009522	AT1G03130.1	PSAD-2	photosystem I subunit D-2
32059593	Eucgr.B01744	Eucgr.B01744.1	Eucgr.B01744.1.p	PF08100,PF00891	PTHR11746,PTHR11746:SF106	KOG3178	2.1.1.68	K13066	GO:0046983,GO:0008171	AT5G54160.1	ATOMT1,OMT1	O-methyltransferase 1
32061921	Eucgr.B01760	Eucgr.B01760.1	Eucgr.B01760.1.p	PF00080	PTHR10003	KOG0441	1.15.1.1	K04565	GO:0055114,GO:0046872,GO:0006801	AT1G08830.1	CSD1	copper/zinc superoxide dismutase 1
32060435	Eucgr.B01777	Eucgr.B01777.1	Eucgr.B01777.1.p	PF05368	PTHR10366,PTHR10366:SF375					AT4G39230.1		NmrA-like negative transcriptional regulator family protein
32058115	Eucgr.B02294	Eucgr.B02294.1	Eucgr.B02294.1.p	PF00582	PTHR31964,PTHR31964:SF23				GO:0006950	AT3G53990.1		Adenine nucleotide alpha hydrolases-like superfamily protein
32060004	Eucgr.B02310	Eucgr.B02310.1	Eucgr.B02310.1.p	PF00004	PTHR32429,PTHR32429:SF12	KOG0651			GO:0005524	AT2G39730.2	RCA	rubisco activase
32060414	Eucgr.B02456	Eucgr.B02456.4	Eucgr.B02456.4.p	PF00141	PTHR31356,PTHR31356:SF10		1.11.1.11		GO:0055114,GO:0020037,GO:0006979,GO:0004601	AT1G07890.2	APX1,ATAPX01,ATAPX1,CS1,MEE6	ascorbate peroxidase 1
32058518	Eucgr.B02495	Eucgr.B02495.1	Eucgr.B02495.1.p	PF04551	PTHR30454		1.17.7.1	K03526	GO:0055114,GO:0046429,GO:0016114	AT5G60600.1	CLB4,CSB3,GCPE,HDS,ISPG	4-hydroxy-3-methylbut-2-enyl diphosphate synthase
32046557	Eucgr.B02711	Eucgr.B02711.2	Eucgr.B02711.2.p	PF00248	PTHR11732,PTHR11732:SF223					AT2G37770.1		NAD(P)-linked oxidoreductase superfamily protein
32059609	Eucgr.B02864	Eucgr.B02864.1	Eucgr.B02864.1.p	PF00274	PTHR11627,PTHR11627:SF8		4.1.2.13	K01623	GO:0006096,GO:0004332	AT2G01140.1		Aldolase superfamily protein
32059057	Eucgr.B02878	Eucgr.B02878.1	Eucgr.B02878.1.p	PF11421,PF02874,PF00306,PF00006	PTHR15184,PTHR15184:SF45		3.6.3.14	K02133	GO:0016887,GO:0006754,GO:0005524,GO:0000275,GO:0046034,GO:0015992,GO:0033178,GO:0016820,GO:0015991	AT5G08680.1		ATP synthase alpha/beta family protein
32059994	Eucgr.B03320	Eucgr.B03320.1	Eucgr.B03320.1.p	PF00484	PTHR11002,PTHR11002:SF15	KOG1578	4.2.1.1	K01673	GO:0008270,GO:0004089	AT1G70410.2	ATBCA4,BCA4,CA4	beta carbonic anhydrase 4
32039180	Eucgr.C00146	Eucgr.C00146.1	Eucgr.C00146.1.p	PF00450	PTHR11802,PTHR11802:SF29	KOG1282		K16296	GO:0006508,GO:0004185	AT1G33540.1	scpl18	serine carboxypeptidase-like 18
32038852	Eucgr.C00615	Eucgr.C00615.1	Eucgr.C00615.1.p	PF00235	PTHR11604,PTHR11604:SF7	KOG1755		K05759		AT5G56600.1	PFN3,PRF3	profilin 3
32037975	Eucgr.C00719	Eucgr.C00719.1	Eucgr.C00719.1.p	PF07650,PF00189	PTHR11760,PTHR11760:SF20	KOG3181		K02985	GO:0003723	AT5G35530.1		Ribosomal protein S3 family protein
32037470	Eucgr.C00962	Eucgr.C00962.1	Eucgr.C00962.1.p	PF00235	PTHR11604,PTHR11604:SF7	KOG1755		K05759		AT4G29350.1	PFN2,PRF2,PRO2	profilin 2
32038269	Eucgr.C01179	Eucgr.C01179.1	Eucgr.C01179.1.p	PF02518,PF00183	PTHR11528,PTHR11528:SF49			K04079	GO:0051082,GO:0006950,GO:0006457,GO:0005524	AT5G56000.1	AtHsp90.4,Hsp81.4	HEAT SHOCK PROTEIN 81.4
32036326	Eucgr.C02535	Eucgr.C02535.1	Eucgr.C02535.1.p	PF02575	PTHR33449,PTHR33449:SF1					AT2G24020.1		Uncharacterised BCR, YbaB family COG0718
32036942	Eucgr.C02765	Eucgr.C02765.1	Eucgr.C02765.1.p	PF00430					GO:0045263,GO:0015986,GO:0015078	AT4G32260.1		ATPase, F0 complex, subunit B/B\', bacterial/chloroplast
32039469	Eucgr.C03047	Eucgr.C03047.1	Eucgr.C03047.1.p	PF02347	PTHR11773,PTHR11773:SF4		1.4.4.2	K00281	GO:0055114,GO:0006546,GO:0004375	AT4G33010.1	AtGLDP1,GLDP1	glycine decarboxylase P-protein 1
32037335	Eucgr.C03525	Eucgr.C03525.1	Eucgr.C03525.1.p	PF02788	PTHR23321,PTHR23321:SF33		4.1.1.39	K01601	GO:0016984,GO:0015977	ATCG00490.1		ribulose-bisphosphate carboxylases
32037418	Eucgr.C03537	Eucgr.C03537.1	Eucgr.C03537.1.p	PF07883	PTHR31238,PTHR31238:SF21					AT5G20630.1	ATGER3,GER3,GLP3,GLP3A,GLP3B	germin 3
32039893	Eucgr.C03812	Eucgr.C03812.2	Eucgr.C03812.2.p	PF08534	PTHR10430	KOG0541	1.11.1.15		GO:0016491	AT1G65980.1	TPX1	thioredoxin-dependent peroxidase 1
32039181	Eucgr.C04037	Eucgr.C04037.1	Eucgr.C04037.1.p	PF00173	PTHR10281			K17278		AT2G24940.1	AtMAPR2,MAPR2	membrane-associated progesterone binding protein 2
32037431	Eucgr.C04235	Eucgr.C04235.1	Eucgr.C04235.1.p		PTHR35742,PTHR35742:SF1					AT4G02530.1		chloroplast thylakoid lumen protein
32050999	Eucgr.D00191	Eucgr.D00191.1	Eucgr.D00191.1.p	PF00574	PTHR10381,PTHR10381:SF24	KOG0840	3.4.21.92	K01358		AT5G45390.1	CLPP4,NCLPP4	CLP protease P4
32050600	Eucgr.D00321	Eucgr.D00321.1	Eucgr.D00321.1.p	PF00504	PTHR21649,PTHR21649:SF26			K08912	GO:0016020,GO:0009765	AT2G34430.1	LHB1B1,LHCB1.4	light-harvesting chlorophyll-protein complex II subunit B1
32050680	Eucgr.D00640	Eucgr.D00640.1	Eucgr.D00640.1.p	PF12481	PTHR11772,PTHR11772:SF15					AT4G27450.1		Aluminium induced protein with YGL and LRDR motifs
32051996	Eucgr.D01934	Eucgr.D01934.1	Eucgr.D01934.1.p	PF04321	PTHR10366,PTHR10366:SF405		1.1.1.133	K12451		AT1G63000.1	NRS/ER,UER1	nucleotide-rhamnose synthase/epimerase-reductase
32051997	Eucgr.D01934	Eucgr.D01934.2	Eucgr.D01934.2.p	PF01370	PTHR10366,PTHR10366:SF405		1.1.1.133	K12451	GO:0050662,GO:0003824	AT1G63000.1	NRS/ER,UER1	nucleotide-rhamnose synthase/epimerase-reductase
32051124	Eucgr.D02118	Eucgr.D02118.2	Eucgr.D02118.2.p	PF09598,PF04774	PTHR12299,PTHR12299:SF24	KOG2945		K13199		AT4G17520.1		Hyaluronan / mRNA binding family
32030013	Eucgr.E00279	Eucgr.E00279.1	Eucgr.E00279.1.p	PF10604	PTHR31213,PTHR31213:SF6			K14496		AT4G17870.1	PYR1,RCAR11	Polyketide cyclase/dehydrase and lipid transport superfamily protein
32030502	Eucgr.E00522	Eucgr.E00522.1	Eucgr.E00522.1.p	PF00141	PTHR31356,PTHR31356:SF9		1.11.1.11		GO:0055114,GO:0020037,GO:0006979,GO:0004601	AT4G35000.1	APX3	ascorbate peroxidase 3
32031691	Eucgr.E00579	Eucgr.E00579.1	Eucgr.E00579.1.p	PF00578	PTHR11592,PTHR11592:SF42	KOG1651	1.11.1.12	K00432	GO:0055114,GO:0016491,GO:0016209,GO:0006979,GO:0004602	AT4G11600.1	ATGPX6,GPX6,LSC803,PHGPX	glutathione peroxidase 6
32029769	Eucgr.E01024	Eucgr.E01024.1	Eucgr.E01024.1.p	PF00012	PTHR19375,PTHR19375:SF228			K09490		AT5G42020.1	BIP,BIP2	Heat shock protein 70 (Hsp 70) family protein
32029017	Eucgr.E01119	Eucgr.E01119.2	Eucgr.E01119.2.p	PF00107,PF08240	PTHR11695,PTHR11695:SF540	KOG0023		K00083	GO:0055114,GO:0016491,GO:0008270	AT1G72680.1	ATCAD1,CAD1	cinnamyl-alcohol dehydrogenase
32031620	Eucgr.E01261	Eucgr.E01261.2	Eucgr.E01261.2.p	PF00485	PTHR10285,PTHR10285:SF74		2.7.1.19		GO:0016301,GO:0008152,GO:0005524	AT1G32060.1	PRK	phosphoribulokinase
32028197	Eucgr.E01779	Eucgr.E01779.1	Eucgr.E01779.1.p	PF13499	PTHR10891,PTHR10891:SF597		2.7.1.107			AT2G44310.1		Calcium-binding EF-hand family protein
32029924	Eucgr.E02381	Eucgr.E02381.1	Eucgr.E02381.1.p	PF00504	PTHR21649,PTHR21649:SF26			K08912	GO:0016020,GO:0009765	AT2G34430.1	LHB1B1,LHCB1.4	light-harvesting chlorophyll-protein complex II subunit B1
32030700	Eucgr.E02606	Eucgr.E02606.1	Eucgr.E02606.1.p	PF01333,PF16639	PTHR33288,PTHR33288:SF3			K02634	GO:0031361,GO:0020037,GO:0015979,GO:0009055,GO:0005506	ATCG00540.1		photosynthetic electron transfer A
32029727	Eucgr.E03875	Eucgr.E03875.1	Eucgr.E03875.1.p	PF08100,PF00891	PTHR11746,PTHR11746:SF106	KOG3178	2.1.1.76,2.1.1.68,2.1.1.42	K13066	GO:0046983,GO:0008171	AT5G54160.1	ATOMT1,OMT1	O-methyltransferase 1
32056623	Eucgr.F00370	Eucgr.F00370.1	Eucgr.F00370.1.p	PF00244	PTHR18860,PTHR18860:SF26	KOG0841		K06630	GO:0019904	AT1G78300.1	14-3-3OMEGA,GF14 OMEGA,GRF2	general regulatory factor 2
32053233	Eucgr.F01209	Eucgr.F01209.1	Eucgr.F01209.1.p	PF00056,PF02866	PTHR11540		1.1.1.37	K00026	GO:0055114,GO:0016491,GO:0016616,GO:0019752	AT1G53240.1	mMDH1	Lactate/malate dehydrogenase family protein
32055937	Eucgr.F01221	Eucgr.F01221.5	Eucgr.F01221.5.p	PF01965	PTHR11019,PTHR11019:SF100	KOG2764		K03152		AT1G53280.1		Class I glutamine amidotransferase-like superfamily protein
32052915	Eucgr.F01378	Eucgr.F01378.4	Eucgr.F01378.4.p	PF02431	PTHR28039,PTHR28039:SF6		5.5.1.6		GO:0016872	AT1G53520.1		Chalcone-flavanone isomerase family protein
32055445	Eucgr.F01586	Eucgr.F01586.1	Eucgr.F01586.1.p	PF10584,PF00227	PTHR11599,PTHR11599:SF12	KOG0863	3.4.25.1	K02725	GO:0019773,GO:0006511,GO:0004175,GO:0051603,GO:0005839,GO:0004298	AT5G42790.1	ARS5,ATPSM30,PAF1	proteasome alpha subunit F1
32056245	Eucgr.F01822	Eucgr.F01822.1	Eucgr.F01822.1.p	PF01789	PTHR31407,PTHR31407:SF17				GO:0019898,GO:0015979,GO:0009654,GO:0009523,GO:0005509	AT1G76450.1		Photosystem II reaction center PsbP family protein
32052753	Eucgr.F02133	Eucgr.F02133.1	Eucgr.F02133.1.p	PF00342	PTHR11469,PTHR11469:SF9		5.3.1.9	K01810	GO:0006096,GO:0006094,GO:0004347	AT4G24620.1	PGI,PGI1	phosphoglucose isomerase 1
32055716	Eucgr.F02457	Eucgr.F02457.2	Eucgr.F02457.2.p	PF13424	PTHR10098,PTHR10098:SF117					AT3G14110.3	FLU	Tetratricopeptide repeat (TPR)-like superfamily protein
32055117	Eucgr.F02479	Eucgr.F02479.1	Eucgr.F02479.1.p	PF06351	PTHR31843,PTHR31843:SF2		5.3.99.6	K10525	GO:0016853,GO:0009507	AT1G13280.1	AOC4	allene oxide cyclase 4
32056554	Eucgr.F02551	Eucgr.F02551.1	Eucgr.F02551.1.p	PF01215	PTHR10122,PTHR10122:SF3			K02265	GO:0005740,GO:0004129	AT1G80230.1		Rubredoxin-like superfamily protein
32055028	Eucgr.F02754	Eucgr.F02754.1	Eucgr.F02754.1.p	PF13098	PTHR10438,PTHR10438:SF290	KOG0910	1.8.1.8	K03671	GO:0045454,GO:0015035,GO:0006662	AT4G03520.1	ATHM2	Thioredoxin superfamily protein
32057001	Eucgr.F02830	Eucgr.F02830.3	Eucgr.F02830.3.p	PF00400	PTHR19877	KOG1036,KOG0316			GO:0005515	AT2G46290.1		Transducin/WD40 repeat-like superfamily protein
32055680	Eucgr.F02872	Eucgr.F02872.1	Eucgr.F02872.1.p	PF03951,PF00120	PTHR20852,PTHR20852:SF59		6.3.1.2	K01915	GO:0006807,GO:0006542,GO:0004356	AT5G37600.1	ATGLN1;1,ATGSR1,GLN1;1,GSR 1	glutamine synthase clone R1
32056347	Eucgr.F03039	Eucgr.F03039.1	Eucgr.F03039.1.p	PF00366	PTHR10744,PTHR10744:SF7	KOG1740			GO:0006412,GO:0005840,GO:0005622,GO:0003735	AT1G79850.1	CS17,PRPS17,RPS17	ribosomal protein S17
32054394	Eucgr.F03152	Eucgr.F03152.1	Eucgr.F03152.1.p	PF04851,PF00271	PTHR24031,PTHR24031:SF294		3.6.4.13	K03257	GO:0016787,GO:0005524,GO:0003677	AT3G13920.1	EIF4A1,RH4,TIF4A1	eukaryotic translation initiation factor 4A1
32055223	Eucgr.F03186	Eucgr.F03186.8	Eucgr.F03186.8.p	PF04725	PTHR34369,PTHR34369:SF2				GO:0042651,GO:0015979,GO:0009654,GO:0009523	AT1G79040.1	PSBR	photosystem II subunit R
32056124	Eucgr.F03251	Eucgr.F03251.1	Eucgr.F03251.1.p	PF00056,PF02866	PTHR11540		1.1.1.37	K00026	GO:0055114,GO:0016491,GO:0016616,GO:0019752	AT1G53240.1	mMDH1	Lactate/malate dehydrogenase family protein
32053250	Eucgr.F03446	Eucgr.F03446.1	Eucgr.F03446.1.p	PF13857	PTHR24151,PTHR24151:SF1					AT1G50900.1		Ankyrin repeat family protein
32053997	Eucgr.F03646	Eucgr.F03646.1	Eucgr.F03646.1.p	PF01241	PTHR34195,PTHR34195:SF1			K08905	GO:0016020,GO:0015979,GO:0009522	AT1G55670.1	PSAG	photosystem I subunit G
32052803	Eucgr.F03789	Eucgr.F03789.1	Eucgr.F03789.1.p	PF00504	PTHR14154,PTHR14154:SF10			K03542		AT1G44575.1	NPQ4,PSBS	Chlorophyll A-B binding family protein
32057467	Eucgr.F03796	Eucgr.F03796.1	Eucgr.F03796.1.p	PF00490	PTHR11458		4.2.1.24	K01698	GO:0046872,GO:0033014,GO:0004655	AT1G69740.2	HEMB1	Aldolase superfamily protein
32057557	Eucgr.F04099	Eucgr.F04099.1	Eucgr.F04099.1.p	PF00504	PTHR21649,PTHR21649:SF16			K08916	GO:0016020,GO:0009765	AT4G10340.1	LHCB5	light harvesting complex of photosystem II 5
32056795	Eucgr.F04120	Eucgr.F04120.1	Eucgr.F04120.1.p	PF10584,PF00227	PTHR11599,PTHR11599:SF16	KOG0181	3.4.25.1	K02726	GO:0019773,GO:0006511,GO:0004175,GO:0051603,GO:0005839,GO:0004298	AT1G79210.2		N-terminal nucleophile aminohydrolases (Ntn hydrolases) superfamily protein
32054597	Eucgr.F04398	Eucgr.F04398.1	Eucgr.F04398.1.p	PF10584,PF00227	PTHR11599,PTHR11599:SF11	KOG0182	3.4.25.1	K02730	GO:0019773,GO:0006511,GO:0004175,GO:0051603,GO:0005839,GO:0004298	AT2G05840.1	PAA2	20S proteasome subunit PAA2
32055811	Eucgr.F04458	Eucgr.F04458.3	Eucgr.F04458.3.p	PF00581	PTHR11364,PTHR11364:SF13	KOG1529	2.8.1.2,2.8.1.1			AT1G79230.1	ATMST1,ATRDH1,MST1,ST1,STR1	mercaptopyruvate sulfurtransferase 1
32071698	Eucgr.G00777	Eucgr.G00777.1	Eucgr.G00777.1.p	PF00504	PTHR21649,PTHR21649:SF28			K08917	GO:0016020,GO:0009765	AT1G15820.1	CP24,LHCB6	light harvesting complex photosystem II subunit 6
32071426	Eucgr.G01192	Eucgr.G01192.1	Eucgr.G01192.1.p	PF00450	PTHR11802,PTHR11802:SF29	KOG1282		K16296	GO:0006508,GO:0004185	AT3G12203.1	scpl17	serine carboxypeptidase-like 17
32072916	Eucgr.G01491	Eucgr.G01491.1	Eucgr.G01491.1.p	PF12695	PTHR23024,PTHR23024:SF187	KOG1515	3.1.1.1			AT1G47480.1		alpha/beta-Hydrolases superfamily protein
32070047	Eucgr.G01834	Eucgr.G01834.1	Eucgr.G01834.1.p	PF05368	PTHR14194,PTHR14194:SF81	KOG1203	1.7.1.6			AT4G35250.1		NAD(P)-binding Rossmann-fold superfamily protein
32071539	Eucgr.G02327	Eucgr.G02327.1	Eucgr.G02327.1.p	PF01055	PTHR22762,PTHR22762:SF56		3.2.1.177	K15925	GO:0005975,GO:0004553	AT1G68560.1	ATXYL1,TRG1,XYL1	alpha-xylosidase 1
32073235	Eucgr.G02896	Eucgr.G02896.1	Eucgr.G02896.1.p	PF00728	PTHR22600,PTHR22600:SF16	KOG2499	3.2.1.52	K12373	GO:0005975,GO:0004553	AT3G55260.1	ATHEX2,HEXO1	beta-hexosaminidase 1
32072825	Eucgr.G02987	Eucgr.G02987.1	Eucgr.G02987.1.p	PF00076,PF12353	PTHR10352	KOG0122		K03248	GO:0003676,GO:0005852,GO:0005737,GO:0003743	AT3G11400.1	ATEIF3G1,EIF3G1	eukaryotic translation initiation factor 3G1
32072176	Eucgr.G03138	Eucgr.G03138.3	Eucgr.G03138.3.p	PF02431	PTHR28039,PTHR28039:SF4		5.5.1.6		GO:0016872	AT5G05270.2		Chalcone-flavanone isomerase family protein
32072177	Eucgr.G03138	Eucgr.G03138.4	Eucgr.G03138.4.p	PF02431	PTHR28039,PTHR28039:SF4		5.5.1.6		GO:0016872	AT5G05270.2		Chalcone-flavanone isomerase family protein
32072813	Eucgr.G03205	Eucgr.G03205.1	Eucgr.G03205.1.p		PTHR35753,PTHR35753:SF1					AT5G07020.1		proline-rich family protein
32043495	Eucgr.H00087	Eucgr.H00087.1	Eucgr.H00087.1.p	PF08541,PF00195	PTHR11877,PTHR11877:SF27		2.3.1.74		GO:0016747,GO:0008610	AT5G13930.1	ATCHS,CHS,TT4	Chalcone and stilbene synthase family protein
32040884	Eucgr.H00199	Eucgr.H00199.1	Eucgr.H00199.1.p	PF14577,PF14576	PTHR33232					AT3G01680.1
32041212	Eucgr.H00624	Eucgr.H00624.1	Eucgr.H00624.1.p		PTHR10351,PTHR10351:SF50			K01527		AT1G17880.1	ATBTF3,BTF3	basic transcription factor 3
32042147	Eucgr.H01006	Eucgr.H01006.1	Eucgr.H01006.1.p	PF00574	PTHR10381,PTHR10381:SF12	KOG0840	3.4.21.92	K01358		AT1G02560.1	CLPP5,NCLPP1,NCLPP5	nuclear encoded CLP protease 5
32040874	Eucgr.H01473	Eucgr.H01473.2	Eucgr.H01473.2.p	PF01765	PTHR20982,PTHR20982:SF8	KOG4759		K02838	GO:0006412	AT3G63190.1	AtcpRRF,cpRRF,HFP108,RRF	ribosome recycling factor, chloroplast precursor
32045280	Eucgr.H02279	Eucgr.H02279.1	Eucgr.H02279.1.p	PF05922,PF02225,PF00082	PTHR10795,PTHR10795:SF335		3.4.14.10		GO:0006508,GO:0004252	AT5G67360.1	ARA12	Subtilase family protein
32041042	Eucgr.H02358	Eucgr.H02358.5	Eucgr.H02358.5.p	PF00056,PF02866	PTHR11540,PTHR11540:SF27		1.1.1.37		GO:0055114,GO:0016491,GO:0016616,GO:0019752	AT2G22780.1	PMDH1	peroxisomal NAD-malate dehydrogenase 1
32041323	Eucgr.H02866	Eucgr.H02866.1	Eucgr.H02866.1.p	PF00118	PTHR11353,PTHR11353:SF80			K04077	GO:0005524	AT3G23990.1	HSP60,HSP60-3B	heat shock protein 60
32041248	Eucgr.H03041	Eucgr.H03041.1	Eucgr.H03041.1.p	PF00248	PTHR11732,PTHR11732:SF255	KOG1575				AT1G04420.1		NAD(P)-linked oxidoreductase superfamily protein
32044999	Eucgr.H03140	Eucgr.H03140.2	Eucgr.H03140.2.p	PF00736	PTHR11595,PTHR11595:SF27	KOG1668			GO:0006414,GO:0005853,GO:0003746	AT2G18110.1		Translation elongation factor EF1B/ribosomal protein S6 family protein
32042578	Eucgr.H03771	Eucgr.H03771.1	Eucgr.H03771.1.p	PF13460	PTHR14194,PTHR14194:SF36	KOG1203	1.3.1.75	K19073		AT5G18660.1	PCB2	NAD(P)-binding Rossmann-fold superfamily protein
32044595	Eucgr.H03928	Eucgr.H03928.1	Eucgr.H03928.1.p	PF00838	PTHR11991	KOG1727				AT3G16640.1	TCTP	translationally controlled tumor protein
32041700	Eucgr.H04086	Eucgr.H04086.1	Eucgr.H04086.1.p	PF01134,PF00070,PF02852	PTHR22912,PTHR22912:SF148		1.8.1.4	K00382	GO:0050660,GO:0008033,GO:0055114,GO:0016491,GO:0045454	AT1G48030.1	mtLPD1	mitochondrial lipoamide dehydrogenase 1
32042216	Eucgr.H04427	Eucgr.H04427.1	Eucgr.H04427.1.p	PF01488,PF08501,PF01487	PTHR21089,PTHR21089:SF12	KOG0692	1.1.1.25,4.2.1.10	K13832	GO:0055114,GO:0004764,GO:0003855	AT3G06350.1	EMB3004,MEE32	dehydroquinate dehydratase, putative / shikimate dehydrogenase, putative
32045597	Eucgr.H04533	Eucgr.H04533.1	Eucgr.H04533.1.p	PF00574	PTHR10381,PTHR10381:SF6		3.4.21.92			AT1G09130.3		ATP-dependent caseinolytic (Clp) protease/crotonase family protein
32064262	Eucgr.I00224	Eucgr.I00224.1	Eucgr.I00224.1.p	PF00107,PF08240	PTHR11695,PTHR11695:SF576		1.1.1.22		GO:0055114,GO:0016491,GO:0008270	AT1G77120.1	ADH,ADH1,ATADH,ATADH1	alcohol dehydrogenase 1
32064663	Eucgr.I00441	Eucgr.I00441.1	Eucgr.I00441.1.p	PF00831	PTHR10916,PTHR10916:SF0	KOG3436		K02904	GO:0006412,GO:0005840,GO:0005622,GO:0003735	AT5G65220.1		Ribosomal L29 family protein
32063551	Eucgr.I00580	Eucgr.I00580.1	Eucgr.I00580.1.p	PF00464	PTHR11680,PTHR11680:SF10		2.1.2.1	K00600	GO:0016740	AT4G37930.1	SHM1,SHMT1,STM	serine transhydroxymethyltransferase 1
32063302	Eucgr.I00998	Eucgr.I00998.1	Eucgr.I00998.1.p	PF12697	PTHR10992,PTHR10992:SF820					AT2G23620.1	ATMES1,MES1	methyl esterase 1
32063575	Eucgr.I01037	Eucgr.I01037.1	Eucgr.I01037.1.p	PF00450	PTHR11802,PTHR11802:SF29	KOG1282		K16296	GO:0006508,GO:0004185	AT1G73270.1	scpl6	serine carboxypeptidase-like 6
32063225	Eucgr.I01129	Eucgr.I01129.1	Eucgr.I01129.1.p	PF00658,PF00076	PTHR24012,PTHR24012:SF366	KOG0123		K13126	GO:0003723,GO:0003676	AT4G34110.1	ATPAB2,PAB2,PABP2	poly(A) binding protein 2
32064125	Eucgr.I01241	Eucgr.I01241.1	Eucgr.I01241.1.p	PF02401	PTHR31619,PTHR31619:SF2		1.17.1.2	K03527	GO:0051745,GO:0050992,GO:0046872,GO:0019288	AT4G34350.1	CLB6,HDR,ISPH	4-hydroxy-3-methylbut-2-enyl diphosphate reductase
32065662	Eucgr.I01326	Eucgr.I01326.1	Eucgr.I01326.1.p	PF00274	PTHR11627,PTHR11627:SF15		4.1.2.13		GO:0006096,GO:0004332	AT4G38970.2	FBA2	fructose-bisphosphate aldolase 2
32064640	Eucgr.I01557	Eucgr.I01557.2	Eucgr.I01557.2.p	PF12796	PTHR24193,PTHR24193:SF88	KOG4214				AT2G17390.1	AKR2B	ankyrin repeat-containing 2B
32063837	Eucgr.I01764	Eucgr.I01764.1	Eucgr.I01764.1.p	PF00462	PTHR10168,PTHR10168:SF104	KOG1752	1.8.1.9	K03676	GO:0045454,GO:0015035,GO:0009055	AT5G40370.1		Glutaredoxin family protein
32064502	Eucgr.I02231	Eucgr.I02231.1	Eucgr.I02231.1.p	PF00266	PTHR21152,PTHR21152:SF1		2.6.1.52	K00831		AT4G35630.1	PSAT	phosphoserine aminotransferase
32064028	Eucgr.I02289	Eucgr.I02289.2	Eucgr.I02289.2.p	PF00581	PTHR12231	KOG1530	2.8.1.1			AT4G35770.1	ATSEN1,DIN1,SEN1	Rhodanese/Cell cycle control phosphatase superfamily protein
32063659	Eucgr.I02307	Eucgr.I02307.2	Eucgr.I02307.2.p	PF00694,PF00330	PTHR11670,PTHR11670:SF40		4.2.1.3	K01681	GO:0008152	AT4G35830.1	ACO1	aconitase 1
32065255	Eucgr.I02340	Eucgr.I02340.2	Eucgr.I02340.2.p	PF00175	PTHR19384,PTHR19384:SF82		1.18.1.2,1.6.99.1		GO:0055114,GO:0016491	AT5G66190.1	ATLFNR1,FNR1	ferredoxin-NADP(+)-oxidoreductase 1
32062901	Eucgr.I02677	Eucgr.I02677.1	Eucgr.I02677.1.p	PF00504	PTHR21649,PTHR21649:SF28			K08917	GO:0016020,GO:0009765	AT1G15820.1	CP24,LHCB6	light harvesting complex photosystem II subunit 6
32063988	Eucgr.I02771	Eucgr.I02771.1	Eucgr.I02771.1.p	PF00012	PTHR19375,PTHR19375:SF204					AT5G49910.1	cpHsc70-2,CPHSC70-2EAT SHOCK PROTEIN 70-2,HSC70-7	chloroplast heat shock protein 70-2
32033432	Eucgr.J00326	Eucgr.J00326.1	Eucgr.J00326.1.p	PF16499	PTHR11452,PTHR11452:SF18			K07407		AT5G08380.1	AGAL1,AtAGAL1	alpha-galactosidase 1
32032624	Eucgr.J00625	Eucgr.J00625.1	Eucgr.J00625.1.p	PF01248	PTHR11449,PTHR11449:SF2	KOG2988		K02908	GO:0006412,GO:0005840,GO:0005622,GO:0003735	AT1G77940.1		Ribosomal protein L7Ae/L30e/S12e/Gadd45 family protein
32034386	Eucgr.J00880	Eucgr.J00880.1	Eucgr.J00880.1.p	PF00085	PTHR10438,PTHR10438:SF270	KOG0910	1.8.1.8	K03671	GO:0045454,GO:0015035,GO:0006662	AT1G50320.1	ATHX,ATX,THX	thioredoxin X
32032451	Eucgr.J01000	Eucgr.J01000.2	Eucgr.J01000.2.p	PF00403	PTHR22814,PTHR22814:SF73	KOG1603			GO:0046872,GO:0030001	AT1G66240.1	ATATX1,ATX1	homolog of anti-oxidant 1
32035219	Eucgr.J01096	Eucgr.J01096.2	Eucgr.J01096.2.p	PF00504	PTHR21649,PTHR21649:SF7			K08907	GO:0016020,GO:0009765	AT3G54890.1	LHCA1	photosystem I light harvesting complex gene 1
32033756	Eucgr.J01234	Eucgr.J01234.1	Eucgr.J01234.1.p	PF00004	PTHR32429,PTHR32429:SF12	KOG0651			GO:0005524	AT2G39730.1	RCA	rubisco activase
32035133	Eucgr.J01502	Eucgr.J01502.1	Eucgr.J01502.1.p	PF12338,PF00101	PTHR31262		4.1.1.39			AT5G38430.1		Ribulose bisphosphate carboxylase (small chain) family protein
32032375	Eucgr.J01541	Eucgr.J01541.1	Eucgr.J01541.1.p	PF00574	PTHR10381,PTHR10381:SF20	KOG0840	3.4.21.92	K01358		AT1G66670.1	CLPP3,NCLPP3	CLP protease proteolytic subunit 3
32034623	Eucgr.J01950	Eucgr.J01950.3	Eucgr.J01950.3.p		PTHR34686,PTHR34686:SF1					AT4G37300.1	MEE59	maternal effect embryo arrest 59
32035677	Eucgr.J02172	Eucgr.J02172.3	Eucgr.J02172.3.p	PF02943	PTHR35113,PTHR35113:SF1		1.8.7.2		GO:0055114,GO:0016730	AT2G04700.1		ferredoxin thioredoxin reductase catalytic beta chain family protein
32035624	Eucgr.J02233	Eucgr.J02233.1	Eucgr.J02233.1.p	PF05691	PTHR31268,PTHR31268:SF2		2.4.1.82	K06617		AT5G40390.1	SIP1	Raffinose synthase family protein
32044640	Eucgr.J02693	Eucgr.J02693.2	Eucgr.J02693.2.p	PF03767	PTHR31284,PTHR31284:SF5		3.1.3.2		GO:0003993	AT4G29270.1		HAD superfamily, subfamily IIIB acid phosphatase
32032218	Eucgr.J02738	Eucgr.J02738.1	Eucgr.J02738.1.p	PF02874	PTHR15184,PTHR15184:SF43		3.6.3.14		GO:0046034,GO:0015992	ATCG00480.1		ATP synthase subunit beta
32032207	Eucgr.J02929	Eucgr.J02929.1	Eucgr.J02929.1.p	PF03767	PTHR31284,PTHR31284:SF5		3.1.3.2		GO:0003993	AT5G51260.1		HAD superfamily, subfamily IIIB acid phosphatase
32035425	Eucgr.J03143	Eucgr.J03143.1	Eucgr.J03143.1.p		PTHR31096,PTHR31096:SF16					AT1G16880.1		uridylyltransferase-related
32067800	Eucgr.K00389	Eucgr.K00389.1	Eucgr.K00389.1.p	PF02507	PTHR34939,PTHR34939:SF1		1.97.1.12	K02694	GO:0015979,GO:0009538,GO:0009522	AT1G31330.1	PSAF	photosystem I subunit F
32068325	Eucgr.K00402	Eucgr.K00402.3	Eucgr.K00402.3.p	PF13599	PTHR14136,PTHR14136:SF11					AT5G53490.1		Tetratricopeptide repeat (TPR)-like superfamily protein
32067689	Eucgr.K00785	Eucgr.K00785.2	Eucgr.K00785.2.p	PF01738	PTHR17630	KOG3043			GO:0016787	AT2G32520.1		alpha/beta-Hydrolases superfamily protein
32065866	Eucgr.K01045	Eucgr.K01045.1	Eucgr.K01045.1.p	PF00153	PTHR24089,PTHR24089:SF340	KOG0749		K05863		AT4G28390.1	AAC3,ATAAC3	ADP/ATP carrier 3
32069499	Eucgr.K01249	Eucgr.K01249.1	Eucgr.K01249.1.p	PF00294	PTHR10584,PTHR10584:SF198		2.7.1.20	K00856		AT5G03300.1	ADK2	adenosine kinase 2
32067889	Eucgr.K01401	Eucgr.K01401.3	Eucgr.K01401.3.p	PF08240,PF00107	PTHR11695,PTHR11695:SF269		1.1.1.284		GO:0055114,GO:0016491,GO:0008270	AT5G43940.2	ADH2,ATGSNOR1,GSNOR,HOT5,PAR2	GroES-like zinc-binding dehydrogenase family protein
32067224	Eucgr.K01508	Eucgr.K01508.1	Eucgr.K01508.1.p	PF08267,PF01717	PTHR30519,PTHR30519:SF0		2.1.1.14	K00549	GO:0008652,GO:0008270,GO:0003871,GO:0009086	AT5G17920.1	ATCIMS,ATMETS,ATMS1	Cobalamin-independent synthase family protein
32069294	Eucgr.K01713	Eucgr.K01713.1	Eucgr.K01713.1.p	PF00756	PTHR10061	KOG3101	3.1.2.12		GO:0046294,GO:0018738	AT2G41530.1	ATSFGH,SFGH	S-formylglutathione hydrolase
32068647	Eucgr.K02019	Eucgr.K02019.2	Eucgr.K02019.2.p	PF00326	PTHR10061	KOG3101	3.1.2.12	K01070	GO:0008236,GO:0006508,GO:0046294,GO:0018738	AT2G41530.1	ATSFGH,SFGH	S-formylglutathione hydrolase
32069235	Eucgr.K02544	Eucgr.K02544.1	Eucgr.K02544.1.p	PF03214	PTHR31682,PTHR31682:SF3		5.4.99.30	K13379	GO:0030244,GO:0016866	AT3G08900.1	RGP,RGP3	reversibly glycosylated polypeptide 3
32066963	Eucgr.K02642	Eucgr.K02642.1	Eucgr.K02642.1.p		PTHR34209,PTHR34209:SF2					AT5G23060.1	CaS	calcium sensing receptor
32069022	Eucgr.K03247	Eucgr.K03247.1	Eucgr.K03247.1.p	PF00298,PF03946	PTHR11661,PTHR11661:SF6	KOG0886		K02870	GO:0006412,GO:0005840,GO:0003735	AT3G53430.1		Ribosomal protein L11 family protein
32047667	Eucgr.L00009	Eucgr.L00009.3	Eucgr.L00009.3.p	PF00291	PTHR10314,PTHR10314:SF110	KOG1252	2.5.1.47			AT2G43750.1	ACS1,ATCS-B,CPACS1,OASB	O-acetylserine (thiol) lyase B
32027847	Eucgr.L01104	Eucgr.L01104.1	Eucgr.L01104.1.p	PF00248	PTHR11732,PTHR11732:SF226		1.1.1.317			AT1G60710.1	ATB2	NAD(P)-linked oxidoreductase superfamily protein
32058001	Eucgr.L01585	Eucgr.L01585.1	Eucgr.L01585.1.p	PF01477	PTHR31718,PTHR31718:SF0				GO:0005515	AT2G22170.1		Lipase/lipooxygenase, PLAT/LH2 family protein
32058003	Eucgr.L01585	Eucgr.L01585.3	Eucgr.L01585.3.p	PF01477	PTHR31718,PTHR31718:SF0				GO:0005515	AT4G39730.1		Lipase/lipooxygenase, PLAT/LH2 family protein
32032071	Eucgr.L02460	Eucgr.L02460.5	Eucgr.L02460.5.p	PF00141	PTHR31235,PTHR31235:SF27		1.11.1.7		GO:0055114,GO:0020037,GO:0006979,GO:0004601	AT2G41480.1		Peroxidase superfamily protein
32069840	Eucgr.L02773	Eucgr.L02773.1	Eucgr.L02773.1.p	PF08669,PF01571	PTHR13847,PTHR13847:SF5		2.1.2.10	K00605	GO:0006546,GO:0004047	AT1G11860.1		Glycine cleavage T-protein family

## Sheet: GO-termos
GO term	Ontology	Description	Number in input list	Number in BG/Ref	p-value	FDR
GO:0015979	P	photosynthesis	14	89	4.2e-16	1.7e-13
GO:0006091	P	generation of precursor metabolites and energy	11	90	8.4e-12	1.7e-09
GO:0044281	P	small molecule metabolic process	21	610	2.6e-11	3.5e-09
GO:0019684	P	photosynthesis, light reaction	8	34	6.4e-11	6.3e-09
GO:0009765	P	photosynthesis, light harvesting	7	22	1.7e-10	1.4e-08
GO:0044710	P	single-organism metabolic process	41	2807	1.2e-09	7.8e-08
GO:0019752	P	carboxylic acid metabolic process	13	328	4.7e-08	2.7e-06
GO:1901575	P	organic substance catabolic process	11	224	6.9e-08	2.8e-06
GO:0044712	P	single-organism catabolic process	8	91	7.1e-08	2.8e-06
GO:0043436	P	oxoacid metabolic process	13	337	6.3e-08	2.8e-06
GO:0008152	P	metabolic process	78	9388	1.5e-07	4.9e-06
GO:0009056	P	catabolic process	11	244	1.6e-07	4.9e-06
GO:0006082	P	organic acid metabolic process	13	366	1.6e-07	4.9e-06
GO:1901564	P	organonitrogen compound metabolic process	19	849	2.3e-07	6.4e-06
GO:0044282	P	small molecule catabolic process	5	24	4.8e-07	1.3e-05
GO:0046034	P	ATP metabolic process	6	82	8.9e-06	0.00022
GO:0009144	P	purine nucleoside triphosphate metabolic process	6	88	1.3e-05	0.00024
GO:0009167	P	purine ribonucleoside monophosphate metabolic process	6	87	1.2e-05	0.00024
GO:0009161	P	ribonucleoside monophosphate metabolic process	6	87	1.2e-05	0.00024
GO:0009126	P	purine nucleoside monophosphate metabolic process	6	87	1.2e-05	0.00024
GO:0009199	P	ribonucleoside triphosphate metabolic process	6	88	1.3e-05	0.00024
GO:0009205	P	purine ribonucleoside triphosphate metabolic process	6	88	1.3e-05	0.00024
GO:0009141	P	nucleoside triphosphate metabolic process	6	90	1.5e-05	0.00024
GO:0009123	P	nucleoside monophosphate metabolic process	6	90	1.5e-05	0.00024
GO:0042278	P	purine nucleoside metabolic process	6	105	3.4e-05	0.00051
GO:0046128	P	purine ribonucleoside metabolic process	6	105	3.4e-05	0.00051
GO:0009259	P	ribonucleotide metabolic process	6	109	4.1e-05	0.00055
GO:0009150	P	purine ribonucleotide metabolic process	6	109	4.1e-05	0.00055
GO:0009119	P	ribonucleoside metabolic process	6	108	3.9e-05	0.00055
GO:1901566	P	organonitrogen compound biosynthetic process	13	618	4.2e-05	0.00055
GO:1901605	P	alpha-amino acid metabolic process	5	66	4.4e-05	0.00057
GO:0044248	P	cellular catabolic process	7	168	5.1e-05	0.00063
GO:0044711	P	single-organism biosynthetic process	11	457	5.3e-05	0.00063
GO:0019693	P	ribose phosphate metabolic process	6	116	5.7e-05	0.00067
GO:0006163	P	purine nucleotide metabolic process	6	120	6.9e-05	0.00078
GO:0044237	P	cellular metabolic process	50	5625	7.6e-05	0.00081
GO:0072521	P	purine-containing compound metabolic process	6	122	7.5e-05	0.00081
GO:0009116	P	nucleoside metabolic process	6	132	0.00011	0.0012
GO:1901657	P	glycosyl compound metabolic process	6	132	0.00011	0.0012
GO:0044699	P	single-organism process	42	4462	0.00012	0.0012
GO:0006979	P	response to oxidative stress	6	138	0.00014	0.0014
GO:0055114	P	oxidation-reduction process	23	1849	0.00017	0.0016
GO:0009117	P	nucleotide metabolic process	6	149	0.00021	0.002
GO:0006753	P	nucleoside phosphate metabolic process	6	151	0.00023	0.0021
GO:0019637	P	organophosphate metabolic process	7	230	0.00033	0.0029
GO:0044763	P	single-organism cellular process	25	2241	0.00045	0.0039
GO:0055086	P	nucleobase-containing small molecule metabolic process	6	181	0.00058	0.0049
GO:1901135	P	carbohydrate derivative metabolic process	7	274	0.00092	0.0076
GO:0009987	P	cellular process	54	6925	0.0012	0.0096
GO:0006950	P	response to stress	9	590	0.0057	0.045
GO:0006412	P	translation	7	383	0.0057	0.045
GO:0043043	P	peptide biosynthetic process	7	391	0.0064	0.048
GO:0043604	P	amide biosynthetic process	7	391	0.0064	0.048
GO:0016853	F	isomerase activity	7	139	1.6e-05	0.0029
GO:0016491	F	oxidoreductase activity	26	2023	3.3e-05	0.003
GO:0016616	F	oxidoreductase activity, acting on the CH-OH group of donors, NAD or NADP as acceptor	5	123	0.0007	0.032
GO:0016667	F	oxidoreductase activity, acting on a sulfur group of donors	5	120	0.00063	0.032
GO:0016614	F	oxidoreductase activity, acting on CH-OH group of donors	5	140	0.0012	0.045
GO:0016209	F	antioxidant activity	5	148	0.0016	0.047
GO:0016829	F	lyase activity	6	229	0.0019	0.049
GO:0034357	C	photosynthetic membrane	7	57	5.9e-08	1.8e-06
GO:0009579	C	thylakoid	7	58	6.6e-08	1.8e-06
GO:0044436	C	thylakoid part	7	58	6.6e-08	1.8e-06
GO:0009521	C	photosystem	6	52	7.6e-07	1.5e-05
GO:0032991	C	macromolecular complex	18	929	3.7e-06	6e-05
GO:0098796	C	membrane protein complex	8	193	1.5e-05	0.0002
GO:0043234	C	protein complex	13	616	4e-05	0.00047
GO:0044424	C	intracellular part	22	1649	9e-05	0.00092
GO:0005622	C	intracellular	22	1726	0.00017	0.0016
GO:0044464	C	cell part	22	1831	0.0004	0.0029
GO:0005623	C	cell	22	1831	0.0004	0.0029
GO:0044444	C	cytoplasmic part	10	596	0.0018	0.012
GO:0005737	C	cytoplasm	11	733	0.0026	0.016
